## Meta-analysis of genetic association with diagnosed Alzheimer's disease identifies novel risk loci and implicates Abeta, Tau, immunity and lipid processing

Kunkle BW<sup>+</sup>\*1, Grenier-Boley B<sup>2,3,4</sup>, Sims R<sup>5</sup>, Bis JC<sup>6</sup>, Naj AC<sup>7</sup>, Boland A<sup>8</sup>, Vronskaya M<sup>5</sup>, van der Lee SJ<sup>9</sup>, Amie-Wolf A<sup>10</sup>, Bellenguez C<sup>2,3,4</sup>, Frizatti A<sup>5</sup>, Chouraki V<sup>2,11</sup>, Martin ER<sup>1,12</sup>, Sleegers K<sup>13,14</sup>, Badarinarayan N<sup>5</sup>, Jakobsdottir J<sup>15</sup>, Hamilton-Nelson KL<sup>1</sup>, Alosa R<sup>8</sup>, Raybould R<sup>5</sup>, Chen Y<sup>10</sup>, Kuzma AB<sup>10</sup>, Hiltunen M<sup>17,18</sup>, Morgan T<sup>5</sup>, Ahmad S<sup>9</sup>, Vardarajan BN<sup>19-21</sup>, Epelbaum J<sup>22</sup>, Hoffmann P<sup>23,24,25</sup>, Boada M<sup>26</sup>, Beecham GW<sup>1,12</sup>, Garnier JG<sup>8</sup>, Harold D<sup>27</sup>, Fitzpatrick AL<sup>28,29</sup>, Valladares O<sup>10</sup>, Moutet ML<sup>8</sup>, Gerrish A<sup>5</sup>, Smith AV<sup>30,31</sup>, Qu L<sup>10</sup>, Bacq D<sup>8</sup>, Denning N<sup>5</sup>, Jian X<sup>32</sup>, Zhao Y<sup>10</sup>, Zompo MD<sup>33</sup>, Fox NC<sup>34</sup>, Grove ML<sup>23</sup>, Choi SH<sup>16</sup>, Mateo I<sup>35</sup>, Hughes JT<sup>36</sup>, Adams HH<sup>9</sup>, Malamon J<sup>10</sup>, Garcia FS<sup>36</sup>, Patel Y<sup>37</sup>, Brody JA<sup>6</sup>, Dombroski B<sup>10</sup>, Naranjo MCD<sup>36</sup>, Daniilidou M<sup>38</sup>, Eiriksdottir G<sup>15</sup>, Mukherjee S<sup>39</sup>, Wallon D<sup>40,41</sup>, Uphill J<sup>42</sup>, Aspelund T<sup>15,43</sup>, Cantwell LB<sup>10</sup>, Garzia F<sup>8</sup>, Galimberti D<sup>44</sup>, Hofer E<sup>45,46</sup>, Butkiewicz M<sup>47</sup>, Fin B<sup>8</sup>, Scarpini E<sup>44</sup>, Sarnowski C<sup>16</sup>, Bush W<sup>47</sup>, Meslage S<sup>8</sup>, Kornhuber J<sup>48</sup>, White CC<sup>49</sup>, Song Y<sup>47</sup>, Barber RC<sup>50</sup>, Engelborghs S<sup>51,52</sup>, Pichler S<sup>53</sup>, Vojinovic D<sup>9</sup>, Adams PM<sup>54</sup>, Vandenbergh R<sup>55</sup>, Mayhaus M<sup>53</sup>, Cupples LA<sup>11,16</sup>, Albert MS<sup>56</sup>, De Deyn PP<sup>51,52</sup>, Gu W<sup>53</sup>, Himali JJ<sup>16,57</sup>, Beekly D<sup>58</sup>, Squassina A<sup>33</sup>, Hartmann AM<sup>59</sup>, Orellana A<sup>26</sup>, Blacker D<sup>60,61</sup>, Rodriguez-Rodriguez E<sup>35</sup>, Lovestone S<sup>62</sup>, Garcia ME<sup>63</sup>, Doody RS<sup>64</sup>, Fernandez CM<sup>36</sup>, Sussams R<sup>65</sup>, Lin H<sup>16</sup>, Fairchild TJ<sup>66</sup>, Benito YA<sup>36</sup>, Holmes C<sup>65</sup>, Comic H<sup>9</sup>, Frosch MP<sup>67</sup>, Thonberg H<sup>68,69</sup>, Maier W<sup>70,71</sup>, Roschupkin G<sup>9</sup>, Ghetti B<sup>72</sup>, Giedraitis V<sup>73</sup>, Kawalia A<sup>74</sup>, Li S<sup>16</sup>, Huebinger RM<sup>75</sup>, Kilander L<sup>73</sup>, Moebus S<sup>76</sup>, Hernández J<sup>26</sup>, Kamboh MI<sup>77-79</sup>, Brundin R<sup>73</sup>, Turton J<sup>74</sup>, Yang Q<sup>16</sup>, Katz MJ<sup>81</sup>, Concaro L<sup>82,83</sup>, Lord J<sup>74</sup>, Beiser AS<sup>11,16</sup>, Keene CD<sup>84</sup>, Helisalmi S<sup>17,18</sup>, Kloszewska I<sup>85</sup>, Kukull WA<sup>29</sup>, Koivisto AM<sup>17,18</sup>, Lynch A<sup>86,87</sup>, Tarraga L<sup>26</sup>, Larson EB<sup>88</sup>, Haapasalo A<sup>89</sup>, Lawlor B<sup>86,87</sup>, Mosley TH<sup>90</sup>, Lipton RB<sup>81</sup>, Solfrizzi V<sup>91</sup>, Gill M<sup>86,87</sup>, Longstreth WT Jr<sup>29,92</sup>, Montine TJ<sup>84</sup>, Frisardi V<sup>91</sup>, Ortega-Cubero S<sup>93,94,95</sup>, Rivadeneira F<sup>9,96,97</sup>, Petersen RC<sup>98</sup>, Deramecourt V<sup>99</sup>, Ciaramella A<sup>100</sup>, Boerwinkle E<sup>101,102</sup>, Reiman EM<sup>103-106</sup>, Fievet N<sup>2,3,4</sup>, Caltagirone C<sup>100</sup>, Rotter JI<sup>107</sup>, Reisch JS<sup>108</sup>, Hanon O<sup>109</sup>, Cupidi C<sup>110</sup>, Uitterlinden AG<sup>9,96,97</sup>, Royall DR<sup>111</sup>, Dufouil C<sup>112,113</sup>, Maletta RG<sup>110</sup>, Moreno-Grau S<sup>26</sup>, Sano M<sup>114</sup>, Brice A<sup>115,116</sup>, Cecchetti R<sup>117</sup>, St George-Hyslop P<sup>118,119</sup>, Ritchie K<sup>120,121</sup>, Tsolaki M<sup>122</sup>, Tsuang DW<sup>123,124</sup>, Dubois B<sup>125-128</sup>, Craig D<sup>129</sup>, Wu CK<sup>130</sup>, Soininen H<sup>17,18</sup>, Avramidou D<sup>122</sup>, Albin RL<sup>131-133</sup>, Fratiglioni L<sup>17,18</sup>, Germanou A<sup>122</sup>, Apostolova LG<sup>134-137</sup>, Keller L<sup>69</sup>, Koutroumani M<sup>122</sup>, Arnold SE<sup>138</sup>, Panza F<sup>91</sup>, Gkatzima O<sup>122</sup>, Asthana S<sup>139-141</sup>, Hannequin D<sup>40,41</sup>, Whitehead P<sup>1</sup>, Atwood CS<sup>139-141</sup>, Caffarra P<sup>82,83</sup>, Hampel H<sup>142-144</sup>, Baldwin CT<sup>145</sup>, Lannfelt L<sup>73</sup>, Rubinsztein DC<sup>118,119</sup>, Barnes LL<sup>147-149</sup>, Pasquier F<sup>99</sup>, Frölich L<sup>150</sup>, Barral S<sup>19-21</sup>, McGuinness B<sup>151</sup>, Beach TG<sup>152</sup>, Johnston J<sup>151</sup>, Becker JT<sup>77,153,154</sup>, Passmore P<sup>151</sup>, Bigio EH<sup>155,156</sup>, Schott JM<sup>34</sup>, Bird TD<sup>92,123</sup>, Warren JD<sup>34</sup>, Boeve BF<sup>98</sup>, Lupton MK<sup>37,157</sup>, Bowen JD<sup>158</sup>, Proitsi P<sup>37,157</sup>, Boxer A<sup>159</sup>, Powell JF<sup>37,157</sup>, Burke JR<sup>160</sup>, Kauwe JK<sup>161</sup>, Burns JM<sup>162</sup>, Mancuso M<sup>163</sup>, Buxbaum JD<sup>114,164,165</sup>, Bonuccelli U<sup>163</sup>, Cairns NJ<sup>166</sup>, McQuillin A<sup>167</sup>, Cao C<sup>168</sup>, Livingston G<sup>167</sup>, Carlson CS<sup>140,141</sup>, Bass NJ<sup>167</sup>, Carlsson CM<sup>169</sup>, Hardy J<sup>170</sup>, Carney RM<sup>171</sup>, Bras J<sup>34,170,172</sup>, Carrasquillo MM<sup>173</sup>, Guerreiro R<sup>34,170,172</sup>, Allen M<sup>173</sup>, Chui HC<sup>174</sup>, Fisher E<sup>175</sup>, Cribbs DH<sup>159</sup>, Masullo C<sup>176</sup>, Crocco EA<sup>177</sup>, DeCarli C<sup>178</sup>, Bisceglia G<sup>174</sup>, Dick M<sup>179</sup>, Ma L<sup>174</sup>, Duara R<sup>180</sup>, Graff-Radford NR<sup>174</sup>, Evans DA<sup>181</sup>, Hodges A<sup>182</sup>, Faber KM<sup>72</sup>, Scherer M<sup>183</sup>, Fallon KB<sup>184</sup>, Riemenschneider M<sup>53</sup>, Fardo DW<sup>185</sup>, Heun R<sup>71</sup>, Farlow MR<sup>136</sup>, Ferris S<sup>186</sup>, Leber M<sup>206</sup>, Foroud TM<sup>135</sup>, Heuser I<sup>187</sup>, Galasko DR<sup>188</sup>, Giegling I<sup>59</sup>, Gearing M<sup>189,190</sup>, Hüll M<sup>191</sup>, Geschwind DH<sup>192</sup>, Gilbert JR<sup>1,12</sup>, Morris J<sup>193,194</sup>, Green RC<sup>195</sup>, Mayo K<sup>193,196,197</sup>, Growdon JH<sup>198</sup>, Feulner T<sup>53</sup>, Hamilton RL<sup>199</sup>, Harrell LE<sup>200</sup>, Dricchel D<sup>201</sup>, Honig LS<sup>19</sup>, Cushion TD<sup>5,202</sup>, Huentelman MJ<sup>103</sup>, Hollingworth P<sup>5</sup>, Hulette CM<sup>203</sup>, Hyman BT<sup>198</sup>, Marshall R<sup>5</sup>, Jarvik GP<sup>204,205</sup>, Meggy A<sup>5</sup>, Abner E<sup>206</sup>, Menzies G<sup>5</sup>, Jin LW<sup>207</sup>, Leonenko G<sup>5</sup>, Jun G<sup>145,208</sup>, Grozeva D<sup>5</sup>, Karydas A<sup>159</sup>, Russo G<sup>209</sup>, Kaye JA<sup>210,211</sup>, Kim R<sup>212</sup>, Jessen F<sup>70,71,213</sup>, Kowall NW<sup>57,214</sup>, Vellas B<sup>215</sup>, Kramer JH<sup>216</sup>, Vardy E<sup>217</sup>, LaFerla FM<sup>218</sup>, Jöckel KH<sup>76</sup>, Lah JJ<sup>219</sup>, Dichgans M<sup>220,221</sup>, Leverenz JB<sup>222</sup>, Mann D<sup>223</sup>, Levey AI<sup>219</sup>, Pickering-Brown S<sup>223</sup>, Lieberman AP<sup>224</sup>, Klopp N<sup>225</sup>, Lunetta KL<sup>16</sup>, Wichmann HE<sup>226,227,228</sup>, Lyketsos CG<sup>229</sup>, Morgan K<sup>230</sup>, Marson DC<sup>200</sup>, Brown K<sup>80</sup>, Martiniuk F<sup>231</sup>, Medway C<sup>80</sup>, Mash DC<sup>232</sup>, Nöthen MM<sup>23,24</sup>, Masliah E<sup>188,233</sup>, Hooper NM<sup>223</sup>, McCormick WC<sup>39</sup>, Daniele A<sup>234</sup>, McCurry SM<sup>235</sup>, Bayer A<sup>236</sup>, McDavid AN<sup>169</sup>, Gallacher J<sup>236</sup>, McKee AC<sup>57,214</sup>, van den Bussche H<sup>183</sup>, Mesulam M<sup>237,156</sup>, Brayne C<sup>238</sup>, Miller BL<sup>239</sup>, Riedel-Heller S<sup>240</sup>, Miller CA<sup>241</sup>, Miller JW<sup>207</sup>, Al-Chalabi A<sup>242</sup>, Morris JC<sup>166,196</sup>, Shaw CE<sup>242,243</sup>, Myers AJ<sup>177</sup>, Wiltfang J<sup>244</sup>, O'Bryant S<sup>50</sup>, Coto E<sup>245</sup>, Olichney JM<sup>178</sup>, Alvarez V<sup>245</sup>, Parisi JE<sup>246</sup>, Singleton AB<sup>247</sup>, Paulson HL<sup>131,133</sup>, Collinge J<sup>42</sup>, Perry W<sup>1</sup>, Mead S<sup>42</sup>, Peskind E<sup>124</sup>, Rosser M<sup>34</sup>, Pierce A<sup>248</sup>, Ryan N<sup>42</sup>, Poon WW<sup>179</sup>, Nacmias B<sup>249,250</sup>, Potter H<sup>251</sup>, Sorbi S<sup>252,253</sup>, Quinn JF<sup>183,184</sup>, Sacchinelli E<sup>100</sup>, Raj A<sup>168</sup>, Spalletta G<sup>100</sup>, Raskind M<sup>124</sup>, Bossù P<sup>100</sup>, Reisberg B<sup>186,254</sup>, Clarke R<sup>255</sup>, Reitz C<sup>20,21,256</sup>, Smith AD<sup>257</sup>, Ringman JM<sup>258</sup>, Warden D<sup>257</sup>, Roberson ED<sup>200</sup>, Wilcock G<sup>257</sup>, Rogaeva E<sup>119</sup>, Bruni AC<sup>110</sup>, Rosen HJ<sup>159</sup>, Gallo M<sup>110</sup>, Rosenberg RN<sup>259</sup>, Ben-Shlomo Y<sup>260</sup>, Sager MA<sup>140</sup>, Mecocci P<sup>117</sup>, Saykin AJ<sup>135,137</sup>, Pastor P<sup>117</sup>, Cuccaro ML<sup>12</sup>, Vance JM<sup>12</sup>, Schneider JA<sup>147,149,261</sup>, Schneider LS<sup>174,262</sup>, Seeley WW<sup>159</sup>, Smith AG<sup>168</sup>, Sonnen JA<sup>84</sup>, Spina S<sup>72</sup>, Stern RA<sup>57</sup>, Swerdlow RH<sup>162</sup>, Tanzi RE<sup>198</sup>, Trojanowski JQ<sup>263</sup>, Troncoso JC<sup>264</sup>, Van Deerlin VM<sup>263</sup>, Van Eldik LJ<sup>265</sup>, Vinters

HV<sup>258,266</sup>, Vonsattel JP<sup>267</sup>, Weintraub S<sup>268</sup>, Welsh-Bohmer KA<sup>160,269</sup>, Wilhelmsen KC<sup>270</sup>, Williamson J<sup>19</sup>, Wingo TS<sup>219</sup>, Woltjer RL<sup>271</sup>, Wright CB<sup>272</sup>, Yu CE<sup>39</sup>, Yu L<sup>147,149</sup>, Alzheimer Disease Genetics Consortium (ADGC), The European Alzheimer's Disease Initiative (EADI), Cohorts for Heart and Aging Research in Genomic Epidemiology Consortium (CHARGE), Genetic and Environmental Risk in AD/Defining Genetic, Polygenic and Environmental Risk for Alzheimer's Disease Consortium (GERAD/PERADES), Crane PK<sup>39</sup>, Bennett DA<sup>147,149</sup>, Boccardi V<sup>117</sup>, De Jager PL<sup>273</sup>, Warner N<sup>274</sup>, Lopez OL<sup>77,79,153</sup>, McDonough S<sup>275</sup>, Ingelsson M<sup>73</sup>, Deloukas P<sup>276</sup>, Cruchaga C<sup>193,194</sup>, Graff C<sup>277,278</sup>, Gwilliam R<sup>276</sup>, Fornage M<sup>132</sup>, Goate AM<sup>164,279</sup>, Sanchez-Juan P<sup>35</sup>, Kehoe PG<sup>280</sup>, Amin N<sup>9</sup>, Ertekin-Taner N<sup>173,281</sup>, Berr C<sup>120,121,282</sup>, Debette S<sup>112,113</sup>, Love S<sup>280</sup>, Launer LJ<sup>63</sup>, Younkin SG<sup>173,281</sup>, Dartigues JF<sup>283</sup>, Corcoran C<sup>284</sup>, Ikram MA<sup>9,285,286</sup>, Dickson DW<sup>173</sup>, Campion D<sup>40,41</sup>, Tschanz J<sup>101</sup>, Schmidt H<sup>46</sup>, Hakonarson H<sup>287,288</sup>, Munger R<sup>101</sup>, Schmidt R<sup>45</sup>, Farrer LA<sup>16,57,60,214,289</sup>, Van Broeckhoven C<sup>13,14</sup>, O'Donovan MC<sup>5</sup>, DeStefano AL<sup>11,16</sup>, Jones L<sup>5</sup>, Haines JL<sup>47</sup>, Deleuze JF<sup>8</sup>, Owen MJ<sup>5</sup>, Gudnason V<sup>15,31</sup>, Mayeux R<sup>23,24,25</sup>, Escott-Price V<sup>5,202</sup>, Psaty BM<sup>10,29,290,291</sup>, Ruiz A<sup>26</sup>, Ramirez A<sup>23,74,213</sup>, Wang LS<sup>10</sup>, van Duijn CM<sup>~9</sup>, Holmans PA<sup>~5</sup>, Seshadri S<sup>~11,57,292</sup>, Williams J<sup>~5</sup>, Amouyel P<sup>~2,3,4</sup>, Schellenberg GD<sup>~10</sup>, Lambert JC<sup>~\*2,3,4</sup>, Pericak-Vance MA<sup>~\*1,12</sup>.

- 1 John P. Hussman Institute for Human Genomics, University of Miami, Miami, Florida, USA.
- 2 INSERM, U1167, RID-AGE-Risk Factors and Molecular Determinants of Aging-Related Diseases, Lille, France.
- 3 Institut Pasteur de Lille, Lille, France.
- 4 University Lille, U1167-Excellence Laboratory LabEx DISTALZ, Lille, France.
- 5 Institute of Psychological Medicine and Clinical Neurosciences, MRC Centre for Neuropsychiatric Genetics and Genomics, Cardiff University, Cardiff, UK.
- 6 Cardiovascular Health Research Unit, Department of Medicine, University of Washington, Seattle, Washington, USA.
- 7 Department of Biostatistics and Epidemiology/Center for Clinical Epidemiology and Biostatistics, University of Pennsylvania Perelman School of Medicine, Philadelphia, Pennsylvania, USA.
- 8 Centre National de Recherche en Génomique Humaine (CNRGH), Institut de biologie François Jacob, CEA, Evry, France.
- 9 Department of Epidemiology, Erasmus Medical Center, Rotterdam, the Netherlands.
- 10 Penn Neurodegeneration Genomics Center, Department of Pathology and Laboratory Medicine, University of Pennsylvania Perelman School of Medicine, Philadelphia, Pennsylvania, USA.
- 11 Framingham Heart Study, Framingham, Massachusetts, USA.
- 12 Dr. John T. Macdonald Foundation, Department of Human Genetics, University of Miami, Miami, Florida, USA.
- 13 Neurodegenerative Brain Diseases Group, Center for Molecular Neurology, VIB, Antwerp, Belgium.
- 14 Laboratory for Neurogenetics, Institute Born-Bunge, University of Antwerp, Antwerp, Belgium.
- 15 Icelandic Heart Association, Kopavogur, Iceland.
- 16 Department of Biostatistics, Boston University School of Public Health, Boston, Massachusetts, USA.
- 17 Institute of Clinical Medicine (Neurology), University of Eastern Finland, Kuopio, Finland.
- 18 Department of Neurology, Kuopio University Hospital, Kuopio, Finland.
- 19 Taub Institute on Alzheimer's Disease and the Aging Brain, Department of Neurology, Columbia University, New York, New York, USA.
- 20 Gertrude H. Sergievsky Center, Columbia University, New York, New York, USA.
- 21 Department of Neurology, Columbia University, New York, New York, USA.
- 22 UMR 894, Center for Psychiatry and Neuroscience, INSERM, Université Paris Descartes, Paris, France.
- 23 Institute of Human Genetics, University of Bonn, Bonn, Germany.
- 24 Department of Genomics, Life & Brain Center, University of Bonn, Bonn, Germany.
- 25 Division of Medical Genetics, University Hospital and Department of Biomedicine, University of Basel, Basel, Switzerland.
- 26 Research Center and Memory Clinic of Fundació ACE, Institut Català de Neurociències Aplicades-UIC, Barcelona, Spain.
- 27 School of Biotechnology, Dublin City University, Dublin, Ireland.
- 28 Department of Family Medicine, University of Washington, Seattle, Washington, USA.
- 29 Department of Epidemiology, University of Washington, Seattle, Washington, USA.
- 30 Department of Biostatistics, University of Michigan, USA.

- 31 Faculty of Medicine, University of Iceland, Reykjavik, Iceland.
- 32 Brown Foundation Institute of Molecular Medicine, University of Texas Health Sciences Center at Houston, Houston, Texas, USA.
- 33 Section of Neuroscience and Clinical Pharmacology, Department of Biomedical Sciences, University of Cagliari, Cagliari, Italy.
- 34 Dementia Research Centre, Department of Neurodegenerative Disease, UCL Institute of Neurology, London, UK.
- 35 Neurology Service and CIBERNED, 'Marqués de Valdecilla' University Hospital (University of Cantabria and IFIMAV), Santander, Spain.
- 36 Department of Immunology, Hospital Universitario Doctor Negrín, Las Palmas de Gran Canaria, Spain.
- 37 Department of Basic and Clinical Neuroscience, Institute of Psychiatry, Psychology and Neuroscience, King's College London, London UK
- 38 Department of Health Sciences, Psychiatry for the Elderly, University of Leicester, Leicester, UK.
- 39 Department of Medicine, University of Washington, Seattle, Washington, USA.
- 40 Normandie University, UNIROUEN, Inserm U1245, Rouen, France.
- 41 Rouen University Hospital, Department of Neurology, Department of Genetics and CNR-MAJ, F 76000, Normandy Center for Genomic and Personalized Medicine, Rouen, France.
- 42 Department of Neurodegenerative Disease, MRC Prion Unit, UCL Institute of Neurology, London, UK.
- 43 Centre for Public Health, University of Iceland, Reykjavik, Iceland.
- 44 Department of Pathophysiology and Transplantation, University of Milan, Fondazione Ca' Granda, IRCCS Ospedale Policlinico, Milan, Italy.
- 45 Department of Neurology, Clinical Division of Neurogeriatrics, Medical University Graz.
- 46 Institute for Medical Informatics, Statistics and Documentation, Medical University of Graz, Austria.
- 47 Department of Population & Quantitative Health Sciences, Case Western Reserve University, Cleveland, OH, USA.
- 48 Department of Psychiatry and Psychotherapy, University of Erlangen-Nuremberg, Erlangen, Germany.
- 49 Program in Medical and Population Genetics, Broad Institute, Cambridge, MA, USA.
- 50 Department of Pharmacology and Neuroscience, University of North Texas Health Science Center, Fort Worth, Texas, USA.
- 51 Institute Born-Bunge, University of Antwerp, Antwerp, Belgium.
- 52 Department of Neurology and Memory Clinic, Hospital Network Antwerp, Antwerp, Belgium.
- 53 Department of Psychiatry and Psychotherapy, University Hospital, Saarland, Germany.
- 54 Department of Psychiatry, University of Texas Southwestern Medical Center, Dallas, Texas, USA.
- 55 Laboratory for Cognitive Neurology, Department of Neurology, University of Leuven, Leuven, Belgium.
- 56 Department of Neurology, Johns Hopkins University, Baltimore, Maryland, USA.
- 57 Department of Neurology, Boston University School of Medicine, Boston University, Boston, Massachusetts, USA.
- 58 National Alzheimer's Coordinating Center, University of Washington, Seattle, Washington, USA.
- 59 Department of Psychiatry, Martin Luther University Halle-Wittenberg, Halle, Germany.
- 60 Department of Epidemiology, Harvard School of Public Health, Boston University, Boston, Massachusetts, USA.
- 61 Department of Psychiatry, Massachusetts General Hospital/Harvard Medical School, Boston, Massachusetts, USA.
- 62 Department of Psychiatry, University of Oxford, Oxford, UK.
- 63 Laboratory of Epidemiology and Population Sciences, National Institute on Aging, Bethesda, Maryland, USA.
- 64 Alzheimer's Disease and Memory Disorders Center, Baylor College of Medicine, Houston, Texas, USA.
- 65 Division of Clinical Neurosciences, School of Medicine, University of Southampton, Southampton, UK.
- 66 Office of Strategy and Measurement, University of North Texas Health Science Center, Fort Worth, Texas, USA.
- 67 C.S. Kubik Laboratory for Neuropathology, Massachusetts General Hospital, Charlestown, Massachusetts, USA.
- 68 Department of Geriatric Medicine, Karolinska University Hospital Huddinge, Stockholm, Sweden.
- 69 Aging Research Center, Department of Neurobiology, Care Sciences and Society, Karolinska Institutet and Stockholm University, Stockholm, Sweden.
- 70 German Center for Neurodegenerative Diseases (DZNE), Bonn, Germany.
- 71 Department of Psychiatry and Psychotherapy, University of Bonn, Bonn, Germany.

- 72 Department of Pathology and Laboratory Medicine, Indiana University, Indianapolis, Indiana, USA.
- 73 Department of Public Health/Geriatrics, Uppsala University, Uppsala, Sweden.
- 74 Department for Neurodegenerative Diseases and Geriatric Psychiatry, University Hospital Bonn, Bonn, Germany
- 75 Department of Surgery, University of Texas Southwestern Medical Center, Dallas, Texas, USA.
- 76 Institute for Medical Informatics, Biometry and Epidemiology, University Hospital of Essen, University Duisburg-Essen, Essen, Germany.
- 77 Department of Psychiatry, University of Pittsburgh, Pittsburgh, Pennsylvania, USA.
- 78 Department of Human Genetics, University of Pittsburgh, Pittsburgh, Pennsylvania, USA.
- 79 Alzheimer's Disease Research Center, University of Pittsburgh, Pittsburgh, Pennsylvania, USA.
- 80 Institute of Genetics, Queen's Medical Centre, University of Nottingham, Nottingham, UK.
- 81 Department of Neurology, Albert Einstein College of Medicine, Bronx, New York, USA.
- 82 Section of Neuroscience, DIMEC-University of Parma, Parma, Italy.
- 83 FERB-Alzheimer Center, Gazzaniga (Bergamo), Italy.
- 84 Department of Pathology, University of Washington, Seattle, Washington, USA.
- 85 Elderly and Psychiatric Disorders Department, Medical University of Lodz, Lodz, Poland.
- 86 Mercer's Institute for Research on Aging, St. James Hospital and Trinity College, Dublin, Ireland.
- 87 James Hospital and Trinity College, Dublin, Ireland.
- 88 Kaiser Permanente Washington Health Research Institute, Seattle, WA, USA.
- 89 A.I. Virtanen Institute for Molecular Sciences, University of Eastern Finland, Kuopio 70211, Finland.
- 90 Departments of Medicine, Geriatrics, Gerontology and Neurology, University of Mississippi Medical Center, Jackson, MS
- 91 Department of Geriatrics, Center for Aging Brain , University of Bari, Bari, Italy.
- 92 Department of Neurology, University of Washington, Seattle, Washington, USA.
- 93 Neurogenetics Laboratory, Division of Neurosciences, Centre for Applied Medical Research, University of Navarra School of Medicine, Pamplona, Spain.
- 94 Centro de Investigación Biomédica en Red de Enfermedades Neurodegenerativas (CIBERNED), Instituto de Salud Carlos III, Madrid, Spain.
- 95 Department of Neurology, Complejo Asistencial Universitario de Palencia, Palencia, Spain.
- 96 Department of Internal Medicine, Erasmus University Medical Center, Rotterdam, the Netherlands.
- 97 Netherlands Consortium on Health Aging and National Genomics Initiative, Leiden, the Netherlands.
- 98 Department of Neurology, Mayo Clinic, Rochester, Minnesota, USA.
- 99 CHU Lille, Memory Center of Lille (Centre Mémoire de Ressources et de Recherche), Lille, France.
- 100 Experimental Neuropsychiatry Laboratory, IRCCS Santa Lucia Foundation, Department of Clinical and Behavioural Neurology, Rome, Italy.
- 101 School of Public Health, Human Genetics Center, University of Texas Health Science Center at Houston, Houston, Texas, USA.
- 102 Human Genome Sequencing Center, Baylor College of Medicine, Houston, Texas, USA.
- 103 Neurogenomics Division, Translational Genomics Research Institute, Phoenix, Arizona, USA.
- 104 Arizona Alzheimer's Consortium, Phoenix, Arizona, USA.
- 105 Banner Alzheimer's Institute, Phoenix, Arizona, USA.
- 106 Department of Psychiatry, University of Arizona, Phoenix, Arizona, USA.
- 107 Institute for Translational Genomics and Population Sciences, Los Angeles BioMedical Research Institute at Harbor-UCLA Medical Center, Torrance, California, USA.
- 108 Department of Clinical Sciences, University of Texas Southwestern Medical Center, Dallas, Texas, USA.
- 109 University Paris Descartes, EA 4468, AP-HP, Hôpital Broca, Geriatrics Department, Paris, France.

- 110 Regional Neurogenetic Centre (CRN), ASP Catanzaro, Lamezia Terme, Italy.
- 111 Departments of Psychiatry, Medicine, Family & Community Medicine, South Texas Veterans Health Administration Geriatric Research Education & Clinical Center (GRECC), UT Health Science Center at San Antonio, San Antonio, Texas, USA.
- 112 University of Bordeaux, Neuroepidemiology, Bordeaux, France.
- 113 INSERM, Neuroepidemiology, UMR 897, Bordeaux, France.
- 114 Department of Psychiatry, Mount Sinai School of Medicine, New York, New York, USA.
- 115 INSERM U1127, CNRS UMR 7225, Sorbonne Universités, UPMC Université Paris 06, UMRS 1127, Institut du Cerveau et de la Moelle Épinière, Paris, France.
- 116 AP-HP, Department of Genetics, Pitié-Salpêtrière Hospital, Paris, France.
- 117 Section of Gerontology and Geriatrics, Department of Medicine, University of Perugia, Perugia, Italy.
- 118 Cambridge Institute for Medical Research, University of Cambridge, Cambridge, UK.
- 119 Tanz Centre for Research in Neurodegenerative Disease, University of Toronto, Toronto, Ontario, Canada.
- 120 INSERM U1061, La Colombière Hospital, Montpellier, France.
- 121 Montpellier University, Montpellier, France
- 122 3rd Department of Neurology, Medical School, Aristotle University of Thessaloniki, Thessaloniki, Greece.
- 123 VA Puget Sound Health Care System/GRECC, Seattle, Washington, USA.
- 124 Department of Psychiatry and Behavioral Sciences, University of Washington School of Medicine, Seattle, Washington, USA.
- 125 Institut de la Mémoire et de la Maladie d'Alzheimer (IM2A) and Institut du Cerveau et de la Moelle Épinière (ICM), Département de Neurologie, Hôpital de la Pitié-Salpêtrière, Paris, France.
- 126 Institut des Neurosciences Translationnelles de Paris (IHU-A-ICM), Institut du Cerveau et de la Moelle Épinière (ICM), Paris, France.
- 127 INSERM, CNRS, UMR-S975, Institut du Cerveau et de la Moelle Epinière (ICM), Paris, France.
- 128 Sorbonne Universités, Université Pierre et Marie Curie, Hôpital de la Pitié-Salpêtrière, AP-HP, Paris, France.
- 129 Ageing Group, Centre for Public Health, School of Medicine, Dentistry and Biomedical Sciences, Queen's University Belfast, UK.
- 130 Departments of Neurology, Pharmacology & Neuroscience, Texas Tech University Health Science Center, Lubbock, Texas, USA.
- 131 Department of Neurology, University of Michigan, Ann Arbor, Michigan, USA.
- 132 Geriatric Research, Education and Clinical Center (GRECC), VA Ann Arbor Healthcare System (VAAHS), Ann Arbor, Michigan, USA.
- 133 Michigan Alzheimer Disease Center, Ann Arbor, Michigan, USA.
- 134 Indiana Alzheimer's Disease Center, Indiana University School of Medicine, Indianapolis, Indiana, USA.
- 135 Department of Medical and Molecular Genetics, Indiana University, Indianapolis, Indiana, USA.
- 136 Department of Neurology, Indiana University, Indianapolis, Indiana, USA.
- 137 Department of Radiology and Imaging Sciences, Indiana University, Indianapolis, Indiana, USA.
- 138 Department of Psychiatry, University of Pennsylvania Perelman School of Medicine, Philadelphia, Pennsylvania, USA.
- 139 Geriatric Research, Education and Clinical Center (GRECC), University of Wisconsin, Madison, Wisconsin, USA.
- 140 Department of Medicine, University of Wisconsin, Madison, Wisconsin, USA.
- 141 Wisconsin Alzheimer's Disease Research Center, Madison, Wisconsin, USA.
- 142 AXA Research Fund and UPMC Chair, Paris, France.
- 143 Sorbonne Universités, Université Pierre et Marie Curie, Paris, France.
- 144 Institut de la Mémoire et de la Maladie d'Alzheimer (IM2A), Département de Neurologie, Hôpital de la Pitié-Salpêtrière, AP-HP, Paris, France.
- 145 Department of Medicine (Biomedical Genetics), Boston University School of Medicine, Boston University, Boston, MA, USA.
- 146 UK Dementia Research Institute, University of Cambridge, Cambridge, UK
- 147 Department of Neurological Sciences, Rush University Medical Center, Chicago, Illinois, USA.



- 148 Department of Behavioral Sciences, Rush University Medical Center, Chicago, Illinois, USA.
- 149 Rush Alzheimer's Disease Center, Rush University Medical Center, Chicago, Illinois, USA.
- 150 Central Institute of Mental Health, Medical Faculty Mannheim, University of Heidelberg, Germany.
- 151 Centre for Public Health, School of Medicine, Dentistry and Biomedical Sciences, Queen's University, Belfast, UK.
- 152 Civin Laboratory for Neuropathology, Banner Sun Health Research Institute, Phoenix, Arizona, USA.
- 153 Department of Neurology, University of Pittsburgh, Pittsburgh, Pennsylvania, USA.
- 154 Department of Psychology, University of Pittsburgh School of Medicine, Pittsburgh, Pennsylvania, USA.
- 155 Department of Pathology, Northwestern University Feinberg School of Medicine, Chicago, Illinois, USA.
- 156 Cognitive Neurology and Alzheimer's Disease Center, Northwestern University Feinberg School of Medicine, Chicago, Illinois, USA.
- 157 Genetic Epidemiology, QIMR Berghofer Medical Research Institute, Herston, Queensland, Australia.
- 158 Swedish Medical Center, Seattle, Washington, USA.
- 159 Department of Neurology, University of California, San Francisco, San Francisco, California, USA.
- 160 Department of Medicine, Duke University, Durham, North Carolina, USA.
- 161 Departments of Biology, Brigham Young University, Provo, Utah, USA.
- 162 University of Kansas Alzheimer's Disease Center, University of Kansas Medical Center, Kansas City, Kansas, USA.
- 163 Department of Experimental and Clinical Medicine, Neurological Institute, University of Pisa, Pisa, Italy.
- 164 Department of Genetics and Genomic Sciences, Mount Sinai School of Medicine, New York, New York, USA.
- 165 Department of Neuroscience, Mount Sinai School of Medicine, New York, New York, USA.
- 166 Department of Pathology and Immunology, Washington University, St. Louis, Missouri, USA.
- 167 Division of Psychiatry, University College London, UK
- 168 USF Health Byrd Alzheimer's Institute, University of South Florida, Tampa, Florida, USA
- 169 Fred Hutchinson Cancer Research Center, Seattle, Washington, USA.
- 170 Department of Molecular Neuroscience, UCL, Institute of Neurology, London, UK.
- 171 Mental Health & Behavioral Science Service, Bruce W. Carter VA Medical Center, Miami, FL
- 172 Department of Medical Sciences, Institute of Biomedicine iBiMED, University of Aveiro, 3810-193 Aveiro, Portugal
- 173 Department of Neuroscience, Mayo Clinic, Jacksonville, FL, USA.
- 174 Department of Neurology, University of Southern California, Los Angeles, California, USA.
- 175 Department of Neurodegenerative Disease, UCL Institute of Neurology, London, UK
- 176 Department of Neurology, Catholic University of Rome, Rome, Italy.
- 177 Department of Psychiatry and Behavioral Sciences, Miller School of Medicine, University of Miami, Miami, Florida, USA.
- 178 Department of Neurology, University of California, Davis, Sacramento, California, USA.
- 179 Institute for Memory Impairments and Neurological Disorders, University of California, Irvine, Irvine, California, USA.
- 180 Wien Center for Alzheimer's Disease and Memory Disorders, Mount Sinai Medical Center, Miami Beach, Florida, USA.
- 181 Rush Institute for Healthy Aging, Department of Internal Medicine, Rush University Medical Center, Chicago, Illinois, USA.
- 182 Department of Old Age Psychiatry, Institute of Psychiatry, Psychology and Neuroscience, King's College London, London, UK.
- 183 Department of Primary Medical Care, University Medical Centre Hamburg-Eppendorf, Hamburg, Germany.
- 184 Department of Pathology, University of Alabama at Birmingham, Birmingham, Alabama, USA.
- 185 Sanders-Brown Center on Aging, Department of Biostatistics, University of Kentucky, Lexington, Kentucky, USA.
- 186 Department of Psychiatry, New York University, New York, New York, USA.
- 187 Department of Psychiatry, Charité University Medicine, Berlin, Germany.
- 188 Department of Neurosciences, University of California, San Diego, La Jolla, California, USA.
- 189 Department of Pathology and Laboratory Medicine, Emory University, Atlanta, Georgia, USA.
- 190 Emory Alzheimer's Disease Center, Emory University, Atlanta, Georgia, USA.
- 191 Department of Psychiatry, University of Freiburg, Freiburg, Germany (M.H.).
- 192 Neurogenetics Program, University of California, Los Angeles, Los Angeles, California, USA.
- 193 Department of Psychiatry, Washington University School of Medicine, St. Louis, Missouri, USA.

- 194 Hope Center Program on Protein Aggregation and Neurodegeneration, Washington University School of Medicine, St. Louis, Missouri, USA.
- 195 Division of Genetics, Department of Medicine and Partners Center for Personalized Genetic Medicine, Brigham and Women's Hospital and Harvard Medical School, Boston, Massachusetts, USA.
- 196 Department of Neurology, Washington University, St. Louis, Missouri, USA.
- 197 Department of Genetics, Washington University, St. Louis, Missouri, USA.
- 198 Department of Neurology, Massachusetts General Hospital/Harvard Medical School, Boston, Massachusetts, USA.
- 199 Department of Pathology (Neuropathology), University of Pittsburgh, Pittsburgh, Pennsylvania, USA.
- 200 Department of Neurology, University of Alabama at Birmingham, Birmingham, Alabama, USA.
- 201 Cologne Center for Genomics, University of Cologne, Cologne, Germany.
- 202 UKDRI Cardiff, Cardiff University, Cardiff, UK.
- 203 Department of Pathology, Duke University, Durham, North Carolina, USA.
- 204 Department of Genome Sciences, University of Washington, Seattle, Washington, USA.
- 205 Department of Medicine (Medical Genetics), University of Washington, Seattle, Washington, USA.
- 206 Sanders-Brown Center on Aging, College of Public Health, Department of Epidemiology, University of Kentucky, Lexington, Kentucky, USA.
- 207 Department of Pathology and Laboratory Medicine, University of California, Davis, Sacramento, California, USA.
- 208 Neurogenetics and Integrated Genomics, Andover Innovative Medicines Institute, Eisai Inc, Andover, MA, USA.
- 209 Functional Genomics Center Zurich, ETH/University of Zurich, Switzerland.
- 210 Department of Neurology, Oregon Health & Science University, Portland, Oregon, USA.
- 211 Department of Neurology, Portland Veterans Affairs Medical Center, Portland, Oregon, USA.
- 212 Department of Pathology and Laboratory Medicine, University of California, Irvine, Irvine, California, USA.
- 213 Department of Psychiatry and Psychotherapy, University of Cologne, Cologne, Germany.
- 214 Department of Pathology, Boston University School of Medicine, Boston University, Boston, Massachusetts, USA.
- 215 INSERM U558, University of Toulouse, Toulouse, France.
- 216 Department of Neuropsychology, University of California San Francisco, San Francisco, California, USA.
- 217 Institute for Ageing and Health, Newcastle University, Biomedical Research Building, Campus for Ageing and Vitality, Newcastle upon Tyne.
- 218 Department of Neurobiology and Behavior, University of California, Irvine, Irvine, California, USA.
- 219 Department of Neurology, Emory University, Atlanta, Georgia, USA.
- 220 Institute for Stroke and Dementia Research, Klinikum der Universität München, Munich, Germany.
- 221 German Center for Neurodegenerative Diseases (DZNE), Munich, Germany.
- 222 Cleveland Clinic Lou Ruvo Center for Brain Health, Cleveland Clinic, Cleveland, Ohio, USA.
- 223 Division of Neuroscience and Experimental Psychology, School of Biological Sciences, Faculty of Biology, Medicine and Health, University of Manchester, Manchester Academic Health Science Centre, Manchester M13 9PT, UK.
- 224 Department of Pathology, University of Michigan, Ann Arbor, Michigan, USA.
- 225 Institute of Epidemiology, Helmholtz Zentrum München, German Research Center for Environmental Health, Neuherberg, Germany.
- 226 Helmholtz Center Munich, Institute of Epidemiology, Neuherberg.
- 227 Ludwig-Maximilians University Chair of Epidemiology, Munich, Germany.
- 228 Joint Biobank Munich and KORA Biobank.
- 229 Department of Psychiatry, Johns Hopkins University, Baltimore, Maryland, USA.
- 230 Human Genetics, Schools of Life Sciences and Medicine, University of Nottingham, Nottingham, UK.
- 231 Department of Medicine-Pulmonary, New York University, New York, New York, USA.
- 232 Department of Neurology, University of Miami, Miami, Florida, USA.
- 233 Department of Pathology, University of California, San Diego, La Jolla, California, USA.
- 234 Institute of Neurology, Catholic University of Sacred Heart, Rome, Italy.

- 235 School of Nursing Northwest Research Group on Aging, University of Washington, Seattle, Washington, USA.
- 236 Institute of Primary Care and Public Health, Cardiff University, Neuadd Meirionnydd, University Hospital of Wales, Heath Park, Cardiff UK.
- 237 Department of Neurology, Northwestern University Feinberg School of Medicine, Chicago, Illinois, USA.
- 238 Institute of Public Health, University of Cambridge, Cambridge, UK.
- 239 Weill Institute for Neurosciences, Memory and Aging Center, University of California, San Francisco, San Francisco, CA, USA
- 240 Institute of Social Medicine, Occupational Health and Public Health, University of Leipzig, Leipzig, Germany.
- 241 Department of Pathology, University of Southern California, Los Angeles, California, USA.
- 242 King's College London, Institute of Psychiatry, Psychology and Neuroscience, UK.
- 243 UK Dementia Research Institute at King's College London, UK.
- 244 LVR-Hospital Essen, Department of Psychiatry and Psychotherapy, University Duisburg-Essen, Germany.
- 245 Molecular Genetics Laboratory-Hospital, University of Central Asturias, Oviedo, Spain.
- 246 Department of Laboratory Medicine and Pathology, Mayo Clinic, Rochester, Minnesota, USA.
- 247 Molecular Genetics Section, Laboratory of Neurogenetics, National Institute on Aging, National Institutes of Health, Bethesda, MD 20892, USA.
- 248 Department of Neurology, University of California, Irvine, Irvine, California, USA.
- 249 NEUROFARBA (Department of Neuroscience, Psychology, Drug Research and Child Health), University of Florence, Florence, Italy.
- 250 Centro di Ricerca, Trasferimento e Alta Formazione DENOTHE, University of Florence, Florence, Italy.
- 251 Department of Neurology, University of Colorado School of Medicine, Aurora, Colorado, USA.
- 252 Department of Neuroscience, Psychology, Drug Research and Child Health, University of Florence, Italy Viale Pieraccini 6, 50139 Florence, Italy.
- 253 IRCCS 'Don Carlo Gnocchi', Florence, Italy.
- 254 Alzheimer's Disease Center, New York University, New York, New York, USA.
- 255 Oxford Healthy Aging Project (OHAP), Clinical Trial Service Unit, University of Oxford, Oxford, UK.
- 256 Department of Epidemiology, Columbia University, New York, New York, USA.
- 257 Oxford Project to Investigate Memory and Ageing (OPTIMA), University of Oxford, Level 4, John Radcliffe Hospital, Oxford OX3 9DU, UK.
- 258 Department of Neurology, University of California, Los Angeles, Los Angeles, California, USA.
- 259 Department of Neurology, University of Texas Southwestern Medical Center, Dallas, Texas, USA.
- 260 Population Health Sciences, Bristol Medical School, University of Bristol, Bristol, UK.
- 261 Department of Pathology (Neuropathology), Rush University Medical Center, Chicago, Illinois, USA.
- 262 Department of Psychiatry, University of Southern California, Los Angeles, California, USA.
- 263 Department of Pathology and Laboratory Medicine, University of Pennsylvania Perelman School of Medicine, Philadelphia, Pennsylvania, USA.
- 264 Department of Pathology, Johns Hopkins University, Baltimore, Maryland, USA.
- 265 Sanders-Brown Center on Aging, Department of Neuroscience, University of Kentucky, Lexington, Kentucky, USA.
- 266 Department of Pathology and Laboratory Medicine, University of California, Los Angeles, Los Angeles, California, USA.
- 267 Taub Institute on Alzheimer's Disease and the Aging Brain, Department of Pathology, Columbia University, New York, New York, USA.
- 268 Department of Psychiatry and Behavioral Sciences, Northwestern University Feinberg School of Medicine, Chicago, Illinois, USA.
- 269 Department of Psychiatry and Behavioral Sciences, Duke University, Durham, North Carolina, USA.
- 270 Department of Genetics, University of North Carolina at Chapel Hill, Chapel Hill, North Carolina, USA.
- 271 Department of Pathology, Oregon Health & Science University, Portland, Oregon, USA.
- 272 Evelyn F. McKnight Brain Institute, Department of Neurology, Miller School of Medicine, University of Miami, Miami, Florida, USA.



- 273 Center for Translational and Computational Neuroimmunology, Department of Neurology, Columbia University Medical Center, New York, New York, USA.
- 274 Somerset Partnership NHS Trust, Somerset, UK.
- 275 Human Genetics, Pfizer Worldwide Research and Development, Cambridge, Massachusetts, USA.
- 276 The Wellcome Trust Sanger Institute, Wellcome Trust Genome Campus, Hinxton, Cambridge, UK.
- 277 Theme Aging, Genetics Unit, Karolinska University Hospital Huddinge, S-14186 Stockholm; 14, Karolinska Institutet, Dept Neurobiology, Care Sciences and Society, Alzheimer Research Center, Novum floor 5, S-141 57 Huddinge, Sweden.
- 278 Karolinska Institutet, Dept Neurobiology, Care Sciences and Society, Alzheimer Research Center, Novum floor 5, S-141 57 Huddinge, Sweden.
- 279 Ronald M. Loeb Center for Alzheimer's Disease, Department of Neuroscience, Icahn School of Medicine at Mount Sinai, New York, New York, USA.
- 280 University of Bristol Institute of Clinical Neurosciences, School of Clinical Sciences, Frenchay Hospital, Bristol, UK.
- 281 Department of Neurology, Mayo Clinic, Jacksonville, Florida, USA.
- 282 Memory Research and Resources Center, CMRR of Montpellier, Department of Neurology, Hospital Gui de Chauliac, Montpellier, France.
- 283 Memory Research and Resources Center, CMRR de Bordeaux, Bordeaux, France.
- 284 Utah State University, Logan, Utah, USA.
- 285 Department of Neurology, Erasmus MC University Medical Center, Rotterdam, the Netherlands.
- 286 Departments of Radiology, Erasmus MC University Medical Center, Rotterdam, The Netherlands.
- 287 Center for Applied Genomics, Children's Hospital of Philadelphia, The Perelman School of Medicine, University of Pennsylvania, Philadelphia, Pennsylvania, USA.
- 288 Division of Human Genetics, Department of Pediatrics, The Perelman School of Medicine, University of Pennsylvania, Philadelphia, Pennsylvania, USA.
- 289 Department of Ophthalmology, Boston University School of Medicine, Boston University, Boston, Massachusetts, USA.
- 290 Department of Health Services, University of Washington, Seattle, Washington, USA.
- 291 Group Health Research Institute, Group Health, Seattle, Washington, USA.
- 292 Glenn Biggs Institute for Alzheimer's and Neurodegenerative Diseases, San Antonio, TX, USA.

+equal contribution first author  
-equal contribution senior author  
\*corresponding author

#### Materials and Correspondence:

Brian W. Kunkle, PhD, MPH  
Hussman Institute for Human Genomics  
Miller School of Medicine  
University of Miami  
1501 NW 10<sup>th</sup> Ave  
Miami, FL 33136  
[bkunkle@miami.edu](mailto:bkunkle@miami.edu)

Jean-Charles Lambert, PhD  
INSERM, U1167  
Laboratoire d'Excellence Distalz  
Institut Pasteur de Lille  
University Lille  
F59000 Lille, France  
[jean-charles.lambert@pasteur-lille.fr](mailto:jean-charles.lambert@pasteur-lille.fr)

Margaret Pericak-Vance, PhD  
Hussman Institute for Human Genomics  
Miller School of Medicine  
University of Miami  
1501 NW 10<sup>th</sup> Ave  
Miami, FL 33136  
[mpericak@miami.edu](mailto:mpericak@miami.edu)

## Introduction

Late-onset Alzheimer's disease (LOAD, onset age > 60 years) is the most prevalent dementia in the elderly<sup>1</sup>, and risk is partially driven by genetics<sup>2</sup>. Many of the loci responsible for this genetic risk were identified by genome-wide association studies (GWAS)<sup>3-8</sup>. To identify additional LOAD risk loci, we performed the largest GWAS to date (89,769 individuals), analyzing both common and rare variants. We confirm 20 previous LOAD risk loci and identify four new genome-wide loci (*IQCK*, *ACE*, *ADAM10*, and *ADAMTS1*). Pathway analysis of these data implicates the immune system and lipid metabolism, and for the first time tau binding proteins and APP metabolism. These findings show that genetic variants affecting APP and A $\beta$  processing are not only associated with early-onset autosomal dominant AD but also with LOAD. Analysis of AD risk genes and pathways show enrichment for rare variants ( $P = 1.32 \times 10^{-7}$ ) indicating that additional rare variants remain to be identified.

## Main Text

Our previous work identified 19 genome-wide significant common variant signals in addition to *APOE*<sup>9</sup>, that influence risk for LOAD. These signals, combined with 'subthreshold' common variant associations, account for ~31% of the genetic variance of LOAD<sup>2</sup>, leaving the majority of genetic risk uncharacterized<sup>10</sup>. To search for additional signals, we conducted a GWAS meta-analysis of non-Hispanic Whites (NHW) using a larger sample (17 new, 46 total datasets) from our group, the International Genomics of Alzheimer's Project (IGAP) (composed of four AD consortia: ADGC, CHARGE, EADI, and GERAD). This sample increases our previous discovery sample (Stage 1) by 29% for cases and 13% for controls (N=21,982 cases; 41,944 controls) (**Supplementary Table 1** and **2**, and **Supplementary Note**). To sample both common and rare variants (minor allele frequency  $MAF \geq 0.01$ , and  $MAF < 0.01$ , respectively), we imputed the discovery datasets using a 1000 Genomes reference panel consisting of

36,648,992 single-nucleotide variants, 1,380,736 insertions/deletions, and 13,805 structural variants. After quality control, 9,456,058 common variants and 2,024,574 rare variants were selected for analysis (a 63% increase from our previous common variant analysis in 2013). Genotype dosages were analyzed within each dataset, and then combined with meta-analysis (**Supplementary Figures 1 and 2** and **Supplementary Table 3**). The Stage 1 discovery meta-analysis was first followed by Stage 2 using the I-select chip we previously developed in Lambert et al (including 11,632 variants, N=18,845) and finally stage 3A (N=6,998). The final sample was 33,692 clinical AD cases and 56,077 controls.

Meta-analysis of Stages 1 and 2 produced 21 associations with  $P \leq 5 \times 10^{-8}$  (**Table 1** and **Figure 1**). Of these, 18 were previously reported as genome-wide significant and three of them are signals not initially described in Lambert et al: the rare R47H *TREM2* coding variant previously reported by others<sup>11–13</sup>; *ECDH3* (rs7920721) which was recently identified as a potential genome-wide significant AD risk locus in several studies<sup>23–25</sup> and *ACE* (rs138190086). In addition, four signal showed suggestive association with a P-value <  $5 \cdot 10^{-7}$  (respectively rs593742, rs830500, rsrs7295246 and rs7185636 for *ADAM10*, *ADAMTS1*, *ADAMTS20*, and *IQCK*).

Stage 3A and meta-analysis of all three stages for these 6 variants (excluding the *TREM2* signal, see **Supplementary Figure 1** for workflow) identified five genome-wide significant sites. In addition to *ECDH3*, this included four new genome-wide AD risk signals at *IQCK*, *ADAMTS1*, *ACE* and *ADAM10* not previously described in other AD GWAS (**Table 2** and **Supplementary Figures 3-7**). *ACE* and *ADAM10* were previously reported as AD candidate genes<sup>14–18</sup> that were not replicated in some subsequent studies<sup>19–21,17,22</sup>. We also extended the analyses of the two loci (*NME8* and *MEF2C*) in stage 3 that were previously genome-wide significant in our 2013 meta-analysis. These loci were not genome-wide significant in our current study and will deserve further investigations (*NME8*:  $P = 2.8 \times 10^{-6}$ ; *MEF2C*:  $P = 2.8 \times 10^{-7}$ ). Of note, GCTA-COJO<sup>23</sup> conditional analysis of the genome-wide loci indicates that *TREM2* and three other loci

(*BIN1*, *ABCA7*, and *PTK2B/CLU*) have multiple independent LOAD association signals (**Supplementary Table 5**), suggesting that the genetic variance associated with some GWAS loci is probably under-estimated.

We also selected 33 SNPs from stage 1 (28 common variants and 5 rare variants in loci not well captured in the I-select chip; see supplementary material and methods section for full selection criteria) for genotyping in stage 3B (including populations of stage 2 and stage 3A). We nominally replicated a rare variant (rs71618613) within an intergenic region near *SUCLG2P4* (MAF = 0.01;  $P = 6.8 \times 10^{-3}$ ; combined- $P = 3.3 \times 10^{-7}$ ) and a low-frequency variant in the *TREM2* region (rs114812713, MAF=0.03,  $P = 1.4 \times 10^{-2}$ ; combined- $P = 4.2 \times 10^{-13}$ ) in the gene *OARD1* that may represent an independent signal according to our conditional analysis (**Table 2, Supplementary Figures 8-9, Supplementary Table 5 and 6**).

To evaluate the biological significance of the newly identified signals and those found previously, we pursued four strategies: expression-quantitative trait loci (eQTL) analyses, differential expression in AD versus control brains, gene cluster/pathway analyses, and expression in AD-relevant tissues<sup>24,25</sup>. For the 24 signals reported here, other evidence indicates that *APOE*<sup>26,27</sup>, *ABCA7*<sup>28,29</sup>, *BIN1*<sup>30</sup>, *TREM2*<sup>11,12</sup>, *SORL1*<sup>31,32</sup>, *ADAM10*<sup>33</sup>, *SPI1*<sup>34</sup>, and *CR1*<sup>35</sup> are the true AD risk gene, though there is a possibility that multiple risk genes exist in these regions<sup>36</sup>. Because many GWAS loci are intergenic, and the closest gene to the sentinel variant may not be the actual risk gene, in these analyses, we considered all genes within  $\pm 500$ kb of the sentinel variant linkage disequilibrium (LD) regions ( $r^2 \geq 0.5$ ) for each locus as a candidate AD gene (**Supplementary Table 7**).

For eQTL analyses, we identified variants in LD with sentinel variants for each locus. For these variants, there were cis-acting eQTLs for 117 genes, with 92 eQTL-controlled genes in AD relevant tissues (**Supplementary Tables 8-11**). For our newly identified loci, the most significant eQTLs for the *ADAM10* signal were for *ADAM10* in blood ( $P = 1.21 \times 10^{-13}$ ). For the *IQCK* signal, the top eQTL was for *DEF8* in monocytes ( $P = 5.75 \times 10^{-48}$ ). For the *ADAMTS1*,

signal, the most significant eQTL was for *ADAMTS1* in blood ( $P = 7.56 \times 10^{-7}$ ). No eQTLs were found for the *ACE* locus. These results indicate that *ADAM10*, *ADAMTS1*, and *DEF8* may be the genes responsible for the observed association signal. For previously identified loci, there were eQTLs for *BIN1* in monocytes ( $P = 3.46 \times 10^{-67}$ ), *PVRIG* in blood at the *NYAP1* locus ( $P = 2.02 \times 10^{-221}$ ), and *SLC24A4* in monocytes ( $P = 1.27 \times 10^{-34}$ ).

To study the differential expression of genes in brains of AD patients versus controls, we used thirteen expression studies<sup>37</sup>. Of 469 protein coding genes within the genome-wide loci, we found 87 upregulated and 55 downregulated genes that were differentially expressed in the same direction in two or more studies. These include four genes at the *ADAM10* locus (*ADAM10* and *SLTM*, each upregulated in two studies; *AQP9*, downregulated in three studies; and *LIPC*, downregulated in two studies), three genes in the *IQCK* locus (*GPRC5B*, *CCP10*, and *GDE1* upregulated in 13, six and four studies, respectively), six genes in the *ACE* locus (*MAP3K3*, *KCNH6* and *FTSJ3*, upregulated in seven, two and two studies respectively; and *DDX42*, *PSMC5* and *TANC2*, downregulated in seven, five and three studies respectively), and three genes in the *ADAMTS1* locus (*ADAMTS1*, *CYYR1*, and *ADAMTS5*, upregulated in ten, two and two studies respectively) (**Supplementary Table 12**). For previously described loci, differentially expressed genes included *TFEB* near *TREM2*, *MS4A6A* (upregulated in 10 studies) at the chromosome 11 *MS4A* gene cluster, and *FERMT2* (upregulated in 9 studies) on chromosome 14, among others. Brain RNA-seq data reveals many of these differentially expressed candidate genes are expressed in AD-relevant cell types (**Supplementary Table 12**).

We conducted pathway analyses (MAGMA<sup>38</sup>) using five gene set resources. Analysis were conducted separately for common ( $MAF \geq 0.01$ ) and rare variants ( $MAF < 0.01$ ). For common variants, we detected four function clusters including: 1) APP metabolism/A $\beta$ -formation (regulation of beta-amyloid formation:  $P = 4.56 \times 10^{-7}$  and regulation of amyloid precursor protein catabolic process:  $P = 3.54 \times 10^{-6}$ ), 2) tau protein binding ( $P = 3.19 \times 10^{-5}$ ), 3) lipid metabolism



(four pathways including protein-lipid complex assembly:  $P = 1.45 \times 10^{-7}$ ), and 4) immune response ( $P = 6.32 \times 10^{-5}$ ) (**Table 3** and **Supplementary Table 13**). Enrichment of the four pathways remains after removal of genes in the *APOE* region. When *APOE*-region genes and genes in the vicinity of genome-wide significant genes are removed, tau shows moderate association ( $P = 0.027$ ) and lipid metabolism and immune related pathways show strong associations ( $P < 0.001$ ) (**Supplementary Table 14**). Genes driving these enrichments (i.e. having a gene-wide  $P < 0.05$ ) include *SCNA*, a Parkinson's risk gene that encodes alpha-synuclein, the main component of Lewy bodies, and may play a role in tauopathies<sup>39,40</sup>, for the tau pathway; apolipoprotein genes (*APOM*, *APOA5*) and *ABCA1*, a major regulator of cellular cholesterol, for the lipid metabolism pathways; and 52 immune pathway genes (**Supplementary Table 15**). While no pathways were significantly enriched for rare variants, lipid and  $A\beta$ -pathways did have nominal significance in rare-variant-only analyses. Importantly, we also observe a highly significant correlation between common and rare pathway gene results ( $P = 1.32 \times 10^{-7}$ ), suggesting that risk AD genes and pathways are enriched for rare variants. In fact, 50 different genes within tau, lipid, immunity and  $A\beta$  pathways show nominal association ( $P < 0.05$ ) with LOAD (**Supplementary Table 15**).

To further explore the APP/ $A\beta$ -pathway enrichment we analyzed a comprehensive set of 335 APP metabolism genes<sup>41</sup> curated from the literature. We observed significant enrichment of this gene-set in common variants ( $P = 2.27 \times 10^{-4}$ ;  $P = 3.19 \times 10^{-4}$  excluding *APOE*), with both *ADAM10* and *ACE* nominally significant drivers of this result (**Table 4** and **Supplementary Table 16 and 17**). Several 'sub-pathways' were also significantly enriched in the common-variants including 'clearance and degradation of  $A\beta$ ' and 'aggregation of  $A\beta$ ', along with its subcategory 'microglia', the latter supporting the recent hypothesis that microglia play a large role in AD<sup>42,43</sup>. Nominal enrichment for risk from rare variants was found for the pathway 'aggregation of  $A\beta$ : chaperone' and 23 of the 335 genes.

To identify candidate genes for our novel loci, we combined results from eQTL, differential expression, AD-relevant tissue expression, and gene function/pathway analyses (**Table 5**). For our *ADAM10* signal, of the 17 genes within this locus, only *ADAM10* meets all our prioritization criteria. In addition, *ADAM10*, the most important  $\alpha$ -secretase in the brain, is a component of the non-amyloidogenic pathway of APP metabolism<sup>44</sup>, and sheds *TREM2*<sup>45</sup>, an innate immunity receptor expressed selectively in microglia. Over-expression of *ADAM10* in mouse models can halt A $\beta$  production and subsequent aggregation<sup>46</sup>. Also two rare *ADAM10* mutations segregating with disease in LOAD families increased A $\beta$  plaque load in “Alzheimer-like” mice, with diminished  $\alpha$ -secretase activity from the mutations likely the causal mechanism<sup>15,33</sup>. For the *IQCK* signal three of the 12 genes at the locus are potential candidate genes: *IQCK*, *DEF8*, and *GPRC5B*. The latter is a regulator of neurogenesis<sup>47,48</sup> and inflammatory signalling in obesity<sup>49</sup>. Of the 23 genes in the *ACE* locus, two meet three of the four prioritization criteria, *PSMC5*, a major regulator of major histocompatibility complex<sup>50,51</sup>, and *CD79B*, a B lymphocyte antigen receptor sub-unit. Candidate gene studies previously associate *ACE* variants with AD risk<sup>16,52,18</sup>, including a strong association in the Wadi Ara, an Israeli Arab community with high risk of AD<sup>17</sup>. However, these studies yielded inconsistent results<sup>19</sup>, and our work is the first to report a clear genome-wide association in NHW at this locus. While our analyses did not prioritize *ACE*, it should not be rejected as a candidate gene, as its expression in AD brain tissue is associated with A $\beta$  load and AD severity<sup>53</sup>. Furthermore, CSF levels of the angiotensin-converting enzyme (ACE) are associated with A $\beta$  levels<sup>54</sup> and LOAD risk<sup>55</sup>, and studies show ACE can inhibit A $\beta$  toxicity and aggregation<sup>56</sup>. Finally, angiotensin II, a product of ACE function mediates a number of neuropathological processes in AD<sup>57</sup> and is now a target for intervention in phase II clinical trials of AD<sup>58</sup>. Another novel genome-wide locus reported here *ADAMTS1*, is within 665 kb of *APP* on chromosome 21. Of four genes at this locus (*ADAMTS1*, *ADAMTS5*, *CYYR1*, *CYYR1-AS1*), our analyses nominates *ADAMTS1*, as the likely risk gene, though we cannot rule out that this signal is a regulatory element for *APP*. *ADAMTS1* is

elevated in Down Syndrome with neurodegeneration and AD<sup>59</sup> and is a potential neuroprotective gene<sup>60,61,62</sup>, or a neuroinflammatory gene important to microglial response<sup>63</sup>.

For previously reported loci, named for the closest gene, applying the same approach for prioritization highlights several genes as described in **Table 5**. It is also interesting to keep in mind that systematic biological screening have also highlighted some of these genes as involved in the APP metabolism (*FERMT2*) or Tau toxicity (*BIN1*, *CD2AP*, *FERMT2*, *CASS4*, *EPHA1*, *PTK2B*)<sup>64–66</sup>. Pathway, tissue and disease traits enrichment analysis supports the utility of our prioritization method, as the 68 prioritized genes are: 1) enriched in substantially more AD relevant pathways and processes, 2) enriched in candidate AD cells such as monocytes (adjusted- $P = 1.75 \times 10^{-6}$ ) and macrophages (adjusted- $P = 6.46 \times 10^{-3}$ ), and 3) increased in associations of dementia-related traits (**Supplementary Table 18 and 19**).

Our work identifies four new genome-wide associations for LOAD and shows that GWAS data combined with high-quality imputation panels can reveal rare disease risk variants (i.e. *TREM2*). The enrichment of rare-variants in pathways associated with AD indicates that additional rare-variants remain to be identified, and larger samples and better imputation panels will facilitate identifying these rare variants. While these rare-variants may not contribute substantially to the predictive value of genetic findings, it will add to the understanding of disease mechanisms and potential drug targets. Discovery of the risk genes at genome-wide loci remains challenging, but we demonstrate that converging evidence from existing and new analyses can prioritize risk genes. We also show that APP metabolism is not only associated with early-onset but also late-onset AD, suggesting that therapies developed by studying early-onset families could also be applicable to the more common late-onset form of the disease. Finally, our analysis showing tau is involved in late-onset AD supports recent evidence that tau may play an early pathological role in AD<sup>67–69</sup>, and confirms that therapies targeting tangle formation/degradation could potentially affect late-onset AD.

## Acknowledgements

**ADGC.** The National Institutes of Health, National Institute on Aging (NIH-NIA) supported this work through the following grants: ADGC, U01 AG032984, RC2 AG036528; Samples from the National Cell Repository for Alzheimer's Disease (NCRAD), which receives government support under a cooperative agreement grant (U24 AG21886) awarded by the National Institute on Aging (NIA), were used in this study. We thank contributors who collected samples used in this study, as well as patients and their families, whose help and participation made this work possible; Data for this study were prepared, archived, and distributed by the National Institute on Aging Alzheimer's Disease Data Storage Site (NIAGADS) at the University of Pennsylvania (U24-AG041689-01); NACC, U01 AG016976; NIA LOAD (Columbia University), U24 AG026395, U24 AG026390, R01AG041797; Banner Sun Health Research Institute P30 AG019610; Boston University, P30 AG013846, U01 AG10483, R01 CA129769, R01 MH080295, R01 AG017173, R01 AG025259, R01 AG048927, R01AG33193, R01 AG009029; Columbia University, P50 AG008702, R37 AG015473, R01 AG037212, R01 AG028786; Duke University, P30 AG028377, AG05128; Emory University, AG025688; Group Health Research Institute, UO1 AG006781, UO1 HG004610, UO1 HG006375, UO1 HG008657; Indiana University, P30 AG10133, R01 AG009956, RC2 AG036650; Johns Hopkins University, P50 AG005146, R01 AG020688; Massachusetts General Hospital, P50 AG005134; Mayo Clinic, P50 AG016574, R01 AG032990, KL2 RR024151; Mount Sinai School of Medicine, P50 AG005138, P01 AG002219; New York University, P30 AG08051, UL1 RR029893, 5R01AG012101, 5R01AG022374, 5R01AG013616, 1RC2AG036502, 1R01AG035137; North Carolina A&T University, P20 MD000546, R01 AG28786-01A1; Northwestern University, P30 AG013854; Oregon Health & Science University, P30 AG008017, R01 AG026916; Rush University, P30 AG010161, R01 AG019085, R01 AG15819, R01 AG17917, R01 AG030146, R01 AG01101, RC2 AG036650, R01 AG22018; TGen, R01 NS059873; University of Alabama at Birmingham, P50 AG016582; University of Arizona, R01 AG031581; University of California,

Davis, P30 AG010129; University of California, Irvine, P50 AG016573; University of California, Los Angeles, P50 AG016570; University of California, San Diego, P50 AG005131; University of California, San Francisco, P50 AG023501, P01 AG019724; University of Kentucky, P30 AG028383, AG05144; University of Michigan, P50 AG008671; University of Pennsylvania, P30 AG010124; University of Pittsburgh, P50 AG005133, AG030653, AG041718, AG07562, AG02365; University of Southern California, P50 AG005142; University of Texas Southwestern, P30 AG012300; University of Miami, R01 AG027944, AG010491, AG027944, AG021547, AG019757; University of Washington, P50 AG005136, R01 AG042437; University of Wisconsin, P50 AG033514; Vanderbilt University, R01 AG019085; and Washington University, P50 AG005681, P01 AG03991, P01 AG026276. The Kathleen Price Bryan Brain Bank at Duke University Medical Center is funded by NINDS grant # NS39764, NIMH MH60451 and by Glaxo Smith Kline. Support was also from the Alzheimer's Association (LAF, IIRG-08-89720; MP-V, IIRG-05-14147), the US Department of Veterans Affairs Administration, Office of Research and Development, Biomedical Laboratory Research Program, and BrightFocus Foundation (MP-V, A2111048). P.S.G.-H. is supported by Wellcome Trust, Howard Hughes Medical Institute, and the Canadian Institute of Health Research. Genotyping of the TGEN2 cohort was supported by Kronos Science. The TGen series was also funded by NIA grant AG041232 to AJM and MJH, The Banner Alzheimer's Foundation, The Johnnie B. Byrd Sr. Alzheimer's Institute, the Medical Research Council, and the state of Arizona and also includes samples from the following sites: Newcastle Brain Tissue Resource (funding via the Medical Research Council, local NHS trusts and Newcastle University), MRC London Brain Bank for Neurodegenerative Diseases (funding via the Medical Research Council), South West Dementia Brain Bank (funding via numerous sources including the Higher Education Funding Council for England (HEFCE), Alzheimer's Research Trust (ART), BRACE as well as North Bristol NHS Trust Research and Innovation Department and DeNDRoN), The Netherlands Brain Bank (funding via numerous sources including Stichting MS Research, Brain Net Europe, Hersenstichting Nederland Breinbrekend



Werk, International Parkinson Fonds, Internationale Stichting Alzheimer Onderzoek), Institut de Neuropatologia, Servei Anatomia Patologica, Universitat de Barcelona. ADNI data collection and sharing was funded by the National Institutes of Health Grant U01 AG024904 and Department of Defense award number W81XWH-12-2-0012. ADNI is funded by the National Institute on Aging, the National Institute of Biomedical Imaging and Bioengineering, and through generous contributions from the following: AbbVie, Alzheimer's Association; Alzheimer's Drug Discovery Foundation; Araclon Biotech; BioClinica, Inc.; Biogen; Bristol-Myers Squibb Company; CereSpir, Inc.; Eisai Inc.; Elan Pharmaceuticals, Inc.; Eli Lilly and Company; EuroImmun; F. Hoffmann-La Roche Ltd and its affiliated company Genentech, Inc.; Fujirebio; GE Healthcare; IXICO Ltd.; Janssen Alzheimer Immunotherapy Research & Development, LLC.; Johnson & Johnson Pharmaceutical Research & Development LLC.; Lumosity; Lundbeck; Merck & Co., Inc.; Meso Scale Diagnostics, LLC.; NeuroRx Research; Neurotrack Technologies; Novartis Pharmaceuticals Corporation; Pfizer Inc.; Piramal Imaging; Servier; Takeda Pharmaceutical Company; and Transition Therapeutics. The Canadian Institutes of Health Research is providing funds to support ADNI clinical sites in Canada. Private sector contributions are facilitated by the Foundation for the National Institutes of Health ([www.fnih.org](http://www.fnih.org)). The grantee organization is the Northern California Institute for Research and Education, and the study is coordinated by the Alzheimer's Disease Cooperative Study at the University of California, San Diego. ADNI data are disseminated by the Laboratory for Neuro Imaging at the University of Southern California. We thank Drs. D. Stephen Snyder and Marilyn Miller from NIA who are *ex-officio* ADGC members.

**EADI.** This work has been developed and supported by the LABEX (laboratory of excellence program investment for the future) DISTALZ grant (Development of Innovative Strategies for a Transdisciplinary approach to ALZheimer's disease) including funding from MEL (Metropole européenne de Lille), ERDF (European Regional Development Fund) and Conseil Régional

Nord Pas de Calais. This work was supported by INSERM, the National Foundation for Alzheimer's disease and related disorders, the Institut Pasteur de Lille and the Centre National de Génotypage, the JPND PERADES and the FP7 AgedBrainSysBio. The Three-City Study was performed as part of collaboration between the Institut National de la Santé et de la Recherche Médicale (Inserm), the Victor Segalen Bordeaux II University and Sanofi-Synthélabo. The Fondation pour la Recherche Médicale funded the preparation and initiation of the study. The 3C Study was also funded by the Caisse Nationale Maladie des Travailleurs Salariés, Direction Générale de la Santé, MGEN, Institut de la Longévité, Agence Française de Sécurité Sanitaire des Produits de Santé, the Aquitaine and Bourgogne Regional Councils, Agence Nationale de la Recherche, ANR supported the COGINUT and COVADIS projects. Fondation de France and the joint French Ministry of Research/INSERM "Cohortes et collections de données biologiques" programme. Lille Génopôle received an unconditional grant from Eisai. The Three-city biological bank was developed and maintained by the laboratory for genomic analysis LAG-BRC - Institut Pasteur de Lille.

*Belgium samples:* Research at the Antwerp site is funded in part by the Interuniversity Attraction Poles program of the Belgian Science Policy Office, the Foundation for Alzheimer Research (SAO-FRA), a Methusalem Excellence Grant of the Flemish Government, the Research Foundation Flanders (FWO), the Special Research Fund of the University of Antwerp, Belgium. KB is a postdoctoral fellow of the FWO. The Antwerp site authors thank the personnel of the VIB Genetic Service Facility, the Biobank of the Institute Born-Bunge and the Departments of Neurology and Memory Clinics at the Hospital Network Antwerp and the University Hospitals Leuven.

*Finish sample collection:* Financial support for this project was provided by Academy of Finland (grant number 307866), Sigrid Jusélius Foundation and the Strategic Neuroscience Funding of the University of Eastern Finland

*Swedish sample collection:* Financially supported in part by the Swedish Brain Power network, the Marianne and Marcus Wallenberg Foundation, the Swedish Research Council (521-2010-3134, 2015-02926), the King Gustaf V and Queen Victoria's Foundation of Freemasons, the Regional Agreement on Medical Training and Clinical Research (ALF) between Stockholm County Council and the Karolinska Institutet, the Swedish Brain Foundation and the Swedish Alzheimer Foundation".

**CHARGE.** Infrastructure for the CHARGE Consortium is supported in part by National Heart, Lung, and Blood Institute grant HL105756 (Psaty) and RC2HL102419 (Boerwinkle) and the neurology working group by grants from the National Institute on Aging, R01 AG033193, U01 AG049505 and U01AG52409.

*Rotterdam (RS).* The Rotterdam Study is funded by Erasmus Medical Center and Erasmus University, Rotterdam, the Netherlands Organization for Health Research and Development (ZonMw), the Research Institute for Diseases in the Elderly (RIDE), the Ministry of Education, Culture and Science, the Ministry for Health, Welfare and Sports, the European Commission (DG XII), and the municipality of Rotterdam. The authors are grateful to the study participants, the staff from the Rotterdam Study, and the participating general practitioners and pharmacists. Generation and management of GWAS genotype data for the Rotterdam Study (RS-I, RS-II, RS-III) was executed by the Human Genotyping Facility of the Genetic Laboratory of the Department of Internal Medicine, Erasmus MC, Rotterdam, the Netherlands. The GWAS data sets are supported by the Netherlands Organization of Scientific Research NWO Investments (175.010.2005.011, 911-03-012), the Genetic Laboratory of the Department of Internal Medicine, Erasmus MC, the Research Institute for Diseases in the Elderly (014-93-015; RIDE2), and the Netherlands Genomics Initiative (NGI)/Netherlands Organization for Scientific Research (NWO) Netherlands Consortium for Healthy Aging (NCHA), project 050-060-810. This study makes use of an extended data set of RS-II and RS-III samples based on Illumina Omni 2.5 and

5.0 GWAS genotype data. This data set was funded by the Genetic Laboratory of the Department of Internal Medicine, the Department of Forensic Molecular Biology, and the Department of Dermatology, Erasmus MC, Rotterdam, the Netherlands. We thank M. Jhamai, M. Verkerk, L. Herrera, M. Peters, and C. Medina-Gomez for their help in creating the GWAS database. The work for this manuscript was further supported by ADAPTED: Alzheimer's Disease Apolipoprotein Pathology for Treatment Elucidation and Development (115975); the CoSTREAM project (<http://www.costream.eu/>); and funding from the European Union's Horizon 2020 research and innovation programme under grant agreement 667375. The ERF study as a part of EUROSPAN (European Special Populations Research Network) was supported by European Commission FP6 STRP grant number 018947 (LSHG-CT-2006-01947) and also received funding from the European Community's Seventh Framework Programme (FP7/2007-2013)/grant agreement HEALTH-F4-2007-201413 by the European Commission under the programme "Quality of Life and Management of the Living Resources" of 5th Framework Programme (no. QLG2-CT-2002-01254). High-throughput analysis of the ERF data was supported by a joint grant from the Netherlands Organization for Scientific Research and the Russian Foundation for Basic Research (NWO-RFBR 047.017.043).

*AGES*. The AGES study has been funded by NIA contracts N01-AG-12100 and HHSN271201200022C with contributions from NEI, NIDCD, and NHLBI, the NIA Intramural Research Program, Hjartavernd (the Icelandic Heart Association), and the Althingi (the Icelandic Parliament).

*Cardiovascular Health Study (CHS)*. This research was supported by contracts HHSN268201200036C, HHSN268200800007C, N01HC55222, N01HC85079, N01HC85080, N01HC85081, N01HC85082, N01HC85083, and N01HC85086 and grant U01HL080295 and U01HL130114 from the National Heart, Lung, and Blood Institute (NHLBI), with additional contribution from the National Institute of Neurological Disorders and Stroke (NINDS). Additional

support was provided by R01AG033193, R01AG023629, R01AG15928, and R01AG20098 and by U01AG049505 from the National Institute on Aging (NIA). The provision of genotyping data was supported in part by the National Center for Advancing Translational Sciences, CTSI grant UL1TR000124, and National Institute of Diabetes and Digestive and Kidney Disease Diabetes Research Center (DRC) grant DK063491 to the Southern California Diabetes Endocrinology Research Center. A full list of CHS principal investigators and institutions can be found at <https://chs-nhlbi.org/>. The content is solely the responsibility of the authors and does not necessarily represent the official views of the US National Institutes of Health.

*Framingham Heart Study.* This work was supported by the National Heart, Lung, and Blood Institute's Framingham Heart Study (contracts N01-HC-25195 and HHSN268201500001I). This study was also supported by grants from the National Institute on Aging: R01AG033193, U01AG049505, U01AG52409, R01AG054076 (S. Seshadri). S. Seshadri and A.L.D. were also supported by additional grants from the National Institute on Aging (R01AG049607, R01AG033040) and the National Institute of Neurological Disorders and Stroke (R01-NS017950, NS100605). The content is solely the responsibility of the authors and does not necessarily represent the official views of the US National Institutes of Health.

*Fundació ACE.* We would like to thank patients and controls who participated in this project. We also want to thank the private sponsors supporting the basic and clinical projects of our institution (Grifols SA, Piramal AG, Laboratorios Echevarne, Araclon Biotech S.A. and Fundació ACE). We are indebted to Trinitat Port-Carbó legacy and her family for their support of Fundació ACE research programs. Fundació ACE collaborates with the Centro de Investigación Biomédica en Red sobre Enfermedades Neurodegenerativas (CIBERNED, Spain) and is one of the participating centers of the Dementia Genetics Spanish Consortium (DEGESCO). A.R. and M.B. are receiving support from the European Union/EFPIA Innovative Medicines Initiative Joint Undertaking ADAPTED and MOPEAD projects (Grants No. 115975 and 115985 respectively).



M.B. and A.R. are also supported by national grants PI13/02434, PI16/01861 and PI17/01474. Acción Estratégica en Salud integrated in the Spanish National R + D + I Plan and financed by ISCIII (Instituto de Salud Carlos III)-Subdirección General de Evaluación and the Fondo Europeo de Desarrollo Regional (FEDER- “Una manera de Hacer Europa”). Genome Resesarch @ Fundació ACE project (GR@ACE) is supported by Fundació bancaria “La Caixa”, ISCIII and Grifols SA.

**GERAD/PERADES.** We thank all individuals who participated in this study. Cardiff University was supported by the Wellcome Trust, Alzheimer’s Society (AS; grant RF014/164), the Medical Research Council (MRC; grants G0801418/1, MR/K013041/1, MR/L023784/1), the European Joint Programme for Neurodegenerative Disease (JPND, grant MR/L501517/1), Alzheimer’s Research UK (ARUK, grant ARUK-PG2014-1), Welsh Assembly Government (grant SGR544:CADR), a donation from the Moondance Charitable Foundation, and the UK Dementia Research Institute at Cardiff. Cambridge University acknowledges support from the MRC. ARUK supported sample collections at the Kings College London, the South West Dementia Bank, Universities of Cambridge, Nottingham, Manchester and Belfast. King’s College London was supported by the NIHR Biomedical Research Centre for Mental Health and Biomedical Research Unit for Dementia at the South London and Maudsley NHS Foundation Trust and Kings College London and the MRC. Alzheimer’s Research UK (ARUK) and the Big Lottery Fund provided support to Nottingham University. Ulster Garden Villages, AS, ARUK, American Federation for Aging Research, NI R&D Office and the Royal College of Physicians/Dunhill Medical Trust provided support for Queen’s University, Belfast. The University of Southampton acknowledges support from the AS. The MRC and Mercer’s Institute for Research on Ageing supported the Trinity College group. DCR is a Wellcome Trust Principal Research fellow. The South West Dementia Brain Bank acknowledges support from Bristol Research into Alzheimer’s and Care of the Elderly. The Charles Wolfson Charitable Trust supported the OPTIMA group.

Washington University was funded by NIH grants, Barnes Jewish Foundation and the Charles and Joanne Knight Alzheimer's Research Initiative. Patient recruitment for the MRC Prion Unit/UCL Department of Neurodegenerative Disease collection was supported by the UCLH/UCL Biomedical Centre and their work was supported by the NIHR Queen Square Dementia BRU. LASER-AD was funded by Lundbeck SA. The Bonn group would like to thank Dr. Heike Koelsch for her scientific support. The Bonn group was funded by the German Federal Ministry of Education and Research (BMBF): Competence Network Dementia (CND) grant number 01GI0102, 01GI0711, 01GI0420. The AgeCoDe study group was supported by the German Federal Ministry for Education and Research grants 01 GI 0710, 01 GI 0712, 01 GI 0713, 01 GI 0714, 01 GI 0715, 01 GI 0716, 01 GI 0717. Genotyping of the Bonn case-control sample was funded by the German centre for Neurodegenerative Diseases (DZNE), Germany. The GERAD Consortium also used samples ascertained by the NIMH AD Genetics Initiative. HH was supported by a grant of the Katharina-Hardt-Foundation, Bad Homburg vor der Höhe, Germany. The KORA F4 studies were financed by Helmholtz Zentrum München; German Research Center for Environmental Health; BMBF; German National Genome Research Network and the Munich Center of Health Sciences. The Heinz Nixdorf Recall cohort was funded by the Heinz Nixdorf Foundation (Dr. Jur. G.Schmidt, Chairman) and BMBF. Coriell Cell Repositories is supported by NINDS and the Intramural Research Program of the National Institute on Aging. We acknowledge use of genotype data from the 1958 Birth Cohort collection, funded by the MRC and the Wellcome Trust which was genotyped by the Wellcome Trust Case Control Consortium and the Type-1 Diabetes Genetics Consortium, sponsored by the National Institute of Diabetes and Digestive and Kidney Diseases, National Institute of Allergy and Infectious Diseases, National Human Genome Research Institute, National Institute of Child Health and Human Development and Juvenile Diabetes Research Foundation International.

The Bonn samples are part of the German Dementia Competence Network (DCN) and the German Research Network on Degenerative Dementia (KNDD), which are funded by the German Federal Ministry of Education and Research (grants KND: 01G10102, 01GI0420, 01GI0422, 01GI0423, 01GI0429, 01GI0431, 01GI0433, 04GI0434; grants KNDD: 01GI1007A, 01GI0710, 01GI0711, 01GI0712, 01GI0713, 01GI0714, 01GI0715, 01GI0716, 01ET1006B). Markus M Nothen is a member of the German Research Foundation (DFG) cluster of excellence ImmunoSensation. Funding for Saarland University was provided by the German Federal Ministry of Education and Research (BMBF), grant number 01GS08125 to Matthias Riemenschneider. The University of Washington was supported by grants from the National Institutes of Health (R01-NS085419 and R01-AG044546), the Alzheimer's Association (NIRG-11-200110) and the American Federation for Aging Research (Carlos Cruchaga was recipient of a New Investigator Award in Alzheimer's disease). Brigham Young University was supported by the Alzheimer's Association (MNIRG-11-205368), the BYU Gerontology Program and the National Institutes of Health (R01-AG11380, R01-AG021136, P30- S069329-01, R01-AG042611). We also acknowledge funding from the Institute of Neurology, UCL, London who were supported in part by the ARUK via an anonymous donor, and by a fellowship to Dr Guerreiro. Seripa, Urbano and Masullo's participation in the study was completely supported by "Ministero della Salute", I.R.C.C.S. Research Program, Ricerca Corrente 2015-2017, Linea n. 2 "Malattie complesse e terapie innovative" and by the "5 × 1000" voluntary contribution. AddNeuromed is supported by InnoMed, an Integrated Project funded by the European Union Sixth Framework programme priority FP6-2004-LIFESCIHEALTH-5, Life Sciences, Genomics and Biotechnology for Health. We are grateful to the Wellcome Trust for awarding a Principal Research Fellowship to Rubensztein (095317/Z/11/Z). Matthias Riemenschneider was funded by the BMBF NGFN Grant 01GS08125. BN supported by Fondazione Cassa di Risparmio di Pistoia e Pescia (grants 2014.0365, 2011.0264 and 2013.0347). Harald Hampel is supported by the AXA Research Fund, the Fondation Universite Pierre et Marie Curie and the "Fondation

pour la Recherchesur Alzheimer”, Paris, France. The research leading to these results has received funding from the program “Investissementsd’ avenir” ANR-10-IAIHU-06 (Agence Nationale de la Recherche-10-IA Agence Institut Hospitalo-Universitaire-6. The Santa Lucia Foundation and the Fondazione Ca’ Granda IRCCS Ospedale Policlinico, Italy, acknowledge the Italian Ministry of Health (grant RC 10.11.12.13/A). We acknowledge Maria A Pastor (Department of Neurology, University of Navarra Medical School and Neuroimaging Laboratory, Center for Applied Medical Research, Pamplona, Spain), for providing DNA samples.

### Author Contributions

**ADGC.** *Study design or conception:* A.C.N., A.A.-W., E.R.M., K.H.-N., A.B.K., B.N.V., G.W.B., O.V., M.Butkiewics, W.B., Y.Song, G.D.S., M.A.P.-V. *Sample contribution:* S.S.M., P.K.C., R.B., P.M.A., M.S.A., D. Beekly, D. Blacker, R.S. Doody, T.J.F., M.P.F., B.Ghetti, R.M.H., M.I.K., M.J.K., C.K., W.K., E.B.L., R.B.L., T.J.M., R.C.P., E.M.R., J.S.R., D.R.R., M. Sano, P.S.G.-H., D.W.T., C.K.W., R.L.A., L.G.A., S.E.A., S.A., C.S.A., C.T.B., L.L.B., S. Barral, T.G.B., J.T.B., E.B., T.D.B., B.F.B., J.D.B., A.Boxer, J.R.B., J.M.B., J.D.Buxbaum, N.J.C., C. Cao, C.S.C., C.M.C., R.M.C., M.M.C., H.C.C., D.H.C., E.A.C., C.DeCarli, M.Dick, R.D., N.R.G.-R., D.A.E., K.M.F., K.B.F., D.W.F., M.R.F., S.F., T.M.F., D.R.G., M.Gearing, D.H.G., J.R.G., R.C.G., J.H.G., R.H., L.E.H., L.S.H., M.J.H., C.M.H., B.T.H., G.P.J., E.A., L.W.J., G.J., A. Karydas, J.A.K., R.K., N.W.K., J.H.K., F.M.L., J.J.L., J.B.L., A.I.L., A.P.L., K.L.L., C.G.L., D.C.M., F.M., D.C.Mash, E.M., W.C.M., S.M.M., A.N.M., A.C.M., M.M., B.L.M., C.A.M., J.W.M., J.C.M., A.J.M., S.O., J.M.O., J.E.P., H.L.P., W.P., E.P., A.P., W.W.P., H.P., J.F.Q., A.Raj, M.R., B.R., C.R., J.M.R., E.D.R., E.R., H.J.R., R.N.R., M.A.S., A.J.S., M.L.C., J. Vance, J.A.S., L.S.S., S.Slifer, W.W.S., A.G.S., J.A.Sonnen, S. Spina, R.A.S., R.H.S., R.E.T., J.Q.T., J.C.T., V.M.V.D., L.J.V.E., H.V.V., J.P.V., S.W., K.A.W.-B., K.C.W., J.Williamson, T.S.W., R.L.W., C.B.W., C.-E.Y., L.Y., D.B., P.L.D.J., S.McDonough, C.Cruchaga, A.M.G., N.E.-T., S.G.Y., D.W.D., H.H., L.A.F., J.Haines, R.Mayeux, L.-S.W., G.D.S., M.A.P.-V. *Data generation:* B.W.K., K.H.-N., A.B.K., O.V., L.Q., Y.Z., J. Malamon, B.Dombroski, P.W., L.B.C., M.A., J.R.G., L.-S.W. *Analysis:* B.W.K., A.C.N., A.A.-W., E.R.M., K.H.-N., A.B.K., B.N.V., G.W.B., O.V., M.Butkiewics, W.B., Y.Song, G.D.S., M.A.P.-V. *Manuscript preparation:* B.W.K., G.D.S., M.A.P.-V. *Study supervision/management:* B.W.K., L.A.F., J.Haines, R.Mayeux, L.-S.W., G.D.S., M.A.P.-V.

**EADI.** *Study design or conception:* P.A., J.-C.L. *Sample contribution:* K.S., M.Hiltunen, J.E., M.D.Z., I.M., F.S.G., M.C.D.N., D.Wallon, S.E., R.V., P.D.D., A.Squassina, E.R.-R., C.M.F., Y.A.B., H.T., V.Giedraitis, L.Kilander, R.Brundin, L.C., S.Helisalmi, A.M.K., A.Haapasalo, V.S., V.Frisardi, V.Deramecourt, N.F., O.H., C.Dufouil, A.Brice, K.R., B.D., H.Soininen, L.Fratiglioni, L.K., F.Panza, D.H., P.C., L.Lannfelt, F.P., M.Ingelsson, C.G., P.S.-J., C.Berr, J.-F.D., D.C., C.V.B., J.-F.Deleuze, P.A., J.-C.L. *Data generation:* R.Aloso, J.-G.G., M.-L.M., D.Bacq, F.G., B.F., S.Meslage *Analysis:* B.G.-B., A.Boland, C.Bellenguez *Manuscript preparation:* B.G.-B., P.A., J.-C.L. *Study supervision/management:* P.A., J.-C.L.

**GERAD/PERADES.** *Study design or conception:* R.Sims, M.C.O., M.J.O., A.R., P.A.H., J.W. *Sample contribution:* R.Raybould, T.Morgan, P.Hoffman, D.Harold, N.D., N.C.F., J.T.H., Y.P., M.Daniilidou, J.U., D.Galimberti, E.Scarpini, J.Kornhuber, S.P., M.Mayhaus, W.G., A.M.H., S.Lovestone, R.Sussams, C.Holmes, W.M., A.Kawalia, S.Moebus, J.Turton, J.Lord, I.K., A.L., B.L., M.Gill, S.O.-C., A.Ciaramella, C.Caltagirone, C.Cupidi, R.G.M., R.Cecchetti, M.T., D.Craig, D.A., A.G., M.K., O.G., D.Markina, H.Hampel, D.C.R., L.F., B.G., J.J., P.Passmore, J.M.S., J.D.W., M.K.L., P.Proitsi, J.Powell, J.S.K.K., M.Mancuso, U.B., A.Q., G.Livingston, N.J.B., J.Hardy, J.B., R.Guerreiro, E.F., C.Masullo, G.B., L.M., A.H., M.Scherer, M.Reimenschneider, R.Heun, M.Leber, I.H., I.G., M.Hull, J.M., K.Mayo, T.F., D.Drichel, T.D.C., P.Hollingworth, R.Marshall, A.Meggy, G.M., G.L., D.G., G.R., F.J., B.V., E.V., K.-H.J., M.Dichgans, D.Mann, S.P.-B., N.K., H.W., K.M., K.Brown, C.Medway, M.M.N., N.M.H., A.Daniele, A.Bayer, J.G., H.V.D.B., C.Brayne, S.R.-H., A.A.-C., C.E.S., J.Wiltfang, E.C., V.A., A.B.S., J.C., S.M., M.Rossor, N.R., B.N., S.Sorbi, E.S., G.S., P.B., R.C., A.D.S., D.W., G.W., A.C.B., M.G., Y.B.-S., P.M., P.P., V.B., N.W., P.D., R.G., P.G.K., S.L., C.C., J.T., R.Munger, A.R., J.W. *Data generation:* R.Sims, R.Raybould, T.Morgan, P.Hoffman, D.Harold, A.Gerrish, N.D., P.Hollingworth, R.Marshall, A.Meggy, A.R., J.W. *Analysis:* R.Sims, M.V., A.F., N.Badarinarayan, D.Harold, G.M., G.L., D.G., V.E.-P., A.R., J.W. *Manuscript preparation:* R.Sims, T.D.C., P.A.H., J.W. *Study supervision/management:* R.Sims, L.J., V.E.-P., A.R., P.A.H., J.W.

**CHARGE.** *Study design or conception:* A.L.D., C.M.V.D., S.S. *Sample contribution:* J.C.B., A.Ruiz, A.L.F., G.E., J.J.H., A.O., M.E.G., H.L., H.Comic, G.Roschupkin, S.Li, I.Hernández, Q.Y., A.S.B., L.T., T.H.M., W.T.L., F.R., E.Boerwinkle, J.I.R., A.G.U., S.M.-G., O.L.L., M.B., M.F., N.A., L.J.L., M.A.I., H.S., R.S., V.G., B.M.P. *Data generation:* J.C.B., J.Jakobsdottir, A.Ruiz,



A.V.S., X.J., S.-H.C., H.H.A., J.A.B., T.A., E.H., C.Sarnowski, D.V., L.A.C. *Analysis:* J.C.B., S.J.v.d.L., V.C., J.Jakobsdottir, Y.C., S.Ahmad, A.Ruiz, A.V.S., C.C.W., C.M.V.D., S.S. *Manuscript preparation:* S.J.v.d.L., A.Ruiz, B.M.P., C.M.V.D., S.S. *Study supervision/management:* C.M.V.D., S.S.

### **Competing Interests statement**

D. Blacker is a consultant for Biogen, Inc. R.C.P. is a consultant for Roche, Inc., Merck, Inc., Genentech, Inc., Biogen, Inc., and Eli Lilly. A.R.W. is a former employee and stockholder of Pfizer, Inc., and a current employee of the Perelman School of Medicine at the University of Pennsylvania Orphan Disease Center in partnership with the Loulou. A.M.G. is a member of the scientific advisory board for Denali Therapeutics. N.E.-T. is a consultant for Cytos. J. Hardy holds a collaborative grant with Cytos cofunded by the Department of Business (Biz). F.J. acts as a consultant for Novartis, Eli Lilly, Nutricia, MSD, Roche, and Piramal. Neither J. Morris nor his family own stock or have equity interest (outside of mutual funds or other externally directed accounts) in any pharmaceutical or biotechnology company. J. Morris is currently participating in clinical trials of antideementia drugs from Eli Lilly and Company, Biogen, and Janssen. J. Morris serves as a consultant for Lilly USA. He receives research support from Eli Lilly/Avid Radiopharmaceuticals and is funded by NIH grants P50AG005681, P01AG003991, P01AG026276, and UF01AG032438.

## References

1. Thies, W., Bleiler, L. & Alzheimer's, A. 2013 Alzheimer's disease facts and figures. *Alzheimers Dement* **9**, 208–245 (2013).
2. Ridge, P. G. *et al.* Assessment of the genetic variance of late-onset Alzheimer's disease. *Neurobiol. Aging* 1–8 (2016). doi:10.1016/j.neurobiolaging.2016.02.024
3. Seshadri, S. *et al.* Genome-wide analysis of genetic loci associated with Alzheimer disease. *JAMA* **303**, 1832–1840 (2010).
4. Jun, G. *et al.* Meta-analysis confirms CR1, CLU, and PICALM as Alzheimer disease risk loci and reveals interactions with APOE genotypes. *Arch Neurol* **67**, 1473–1484 (2010).
5. Naj, A. C. *et al.* Common variants at MS4A4/MS4A6E, CD2AP, CD33 and EPHA1 are associated with late-onset Alzheimer's disease. *Nat Genet* **43**, 436–441 (2011).
6. Harold, D. *et al.* Genome-wide association study identifies variants at CLU and PICALM associated with Alzheimer's disease. *Nat Genet* **41**, 1088–1093 (2009).
7. Hollingworth, P. *et al.* Common variants at ABCA7, MS4A6A/MS4A4E, EPHA1, CD33 and CD2AP are associated with Alzheimer's disease. *Nat Genet* **43**, 429–435 (2011).
8. Lambert, J. C. *et al.* Genome-wide association study identifies variants at CLU and CR1 associated with Alzheimer's disease. *Nat Genet* **41**, 1094–1099 (2009).
9. Lambert, J. C. *et al.* Meta-analysis of 74,046 individuals identifies 11 new susceptibility loci for Alzheimer's disease. *Nat. Genet.* **45**, 1452–8 (2013).
10. Gatz, M. *et al.* Role of genes and environments for explaining Alzheimer disease. *Arch Gen Psychiatry* **63**, 168–174 (2006).
11. Guerreiro, R. *et al.* TREM2 variants in Alzheimer's disease. *N. Engl. J. Med.* **368**, 117–27 (2013).
12. Jonsson, T. *et al.* Variant of TREM2 associated with the risk of Alzheimer's disease. *N. Engl. J. Med.* **368**, 107–16 (2013).
13. Sims, R. C. *et al.* Novel rare coding variants in PLCG2, ABI3 and TREM2 implicate microglial-mediated innate immunity in Alzheimer's disease. *Nat. Genet.* **In press**, 1373–1387 (2017).
14. Vassar, R. ADAM10 prodomain mutations cause late-onset Alzheimer's disease: not just the latest FAD. *Neuron* **80**, 250–253 (2013).
15. Kim, M. *et al.* Potential late-onset Alzheimer's disease-associated mutations in the ADAM10 gene attenuate {alpha}-secretase activity. *Hum Mol Genet* **18**, 3987–3996 (2009).

16. Kehoe, P. G. *et al.* Variation in DCP1, encoding ACE, is associated with susceptibility to Alzheimer disease. *Nat. Genet.* **21**, 71–72 (1999).
17. Meng, Y. *et al.* Association of polymorphisms in the Angiotensin-converting enzyme gene with Alzheimer disease in an Israeli Arab community. *Am J Hum Genet* **78**, 871–877 (2006).
18. Lehmann, D. J. *et al.* Large meta-analysis establishes the ACE insertion-deletion polymorphism as a marker of Alzheimer’s disease. *Am. J. Epidemiol.* **162**, 305–17 (2005).
19. Wang, X.-B. *et al.* Angiotensin-Converting Enzyme Insertion/Deletion Polymorphism Is Not a Major Determining Factor in the Development of Sporadic Alzheimer Disease: Evidence from an Updated Meta-Analysis. *PLoS One* **9**, e111406 (2014).
20. Cai, G. *et al.* Evidence against a role for rare ADAM10 mutations in sporadic Alzheimer disease. *Neurobiol Aging* **33**, 416–417 e3 (2012).
21. Belbin, O. *et al.* A multi-center study of ACE and the risk of late-onset Alzheimer’s disease. *J Alzheimers Dis* **24**, 587–597 (2011).
22. Wakutani, Y. *et al.* Genetic analysis of vascular factors in Alzheimer’s disease. *Ann. N. Y. Acad. Sci.* **977**, 232–8 (2002).
23. Yang, J. *et al.* Conditional and joint multiple-SNP analysis of GWAS summary statistics identifies additional variants influencing complex traits. *Nat. Genet.* **44**, 369–75, S1-3 (2012).
24. Zhang, Y. *et al.* An RNA-sequencing transcriptome and splicing database of glia, neurons, and vascular cells of the cerebral cortex. *J. Neurosci.* **34**, 11929–11947 (2014).
25. Zhang, Y. *et al.* Purification and Characterization of Progenitor and Mature Human Astrocytes Reveals Transcriptional and Functional Differences with Mouse. *Neuron* **89**, 37–53 (2016).
26. Corder, E. H. *et al.* Protective effect of apolipoprotein E type 2 allele for late onset Alzheimer disease. *Nat. Genet.* **7**, 180–184 (1994).
27. Kim, J., Basak, J. M. & Holtzman, D. M. The role of apolipoprotein E in Alzheimer’s disease. *Neuron* **63**, 287–303 (2009).
28. Steinberg, S. *et al.* Loss-of-function variants in ABCA7 confer risk of Alzheimer’s disease. *Nat. Genet.* 26–29 (2015). doi:10.1038/ng.3246
29. Vasquez, J. B., Fardo, D. W. & Estus, S. ABCA7 expression is associated with Alzheimer’s disease polymorphism and disease status. *Neurosci Lett* **556**, 58–62 (2013).
30. Chapuis, J. *et al.* Increased expression of BIN1 mediates Alzheimer genetic risk by

- modulating tau pathology. *Mol Psychiatry* (2013). doi:10.1038/mp.2013.1
31. Rogaevea, E. *et al.* The neuronal sortilin-related receptor SORL1 is genetically associated with Alzheimer disease. *Nat Genet* **39**, 168–177 (2007).
  32. Vardarajan, B. N. *et al.* Coding mutations in *SORL1* and Alzheimer disease. *Ann. Neurol.* **77**, 215–227 (2015).
  33. Suh, J. *et al.* ADAM10 missense mutations potentiate beta-amyloid accumulation by impairing prodomain chaperone function. *Neuron* **80**, 385–401 (2013).
  34. Huang, K. *et al.* A common haplotype lowers PU.1 expression in myeloid cells and delays onset of Alzheimer's disease. *bioRxiv* **20**, 1–9 (2017).
  35. Brouwers, N. *et al.* Alzheimer risk associated with a copy number variation in the complement receptor 1 increasing C3b/C4b binding sites. *Mol Psychiatry* **17**, 223–233 (2012).
  36. Flister, M. J. *et al.* Identifying multiple causative genes at a single GWAS locus. *Genome Res* **23**, 1996–2002 (2013).
  37. Bai, Z. *et al.* AlzBase: an Integrative Database for Gene Dysregulation in Alzheimer's Disease. *Mol. Neurobiol.* **53**, 310–319 (2016).
  38. de Leeuw, C. A., Mooij, J. M., Heskes, T. & Posthuma, D. MAGMA: Generalized Gene-Set Analysis of GWAS Data. *PLoS Comput. Biol.* **11**, 1–19 (2015).
  39. Stefanis, L. alpha-Synuclein in Parkinson's disease. *Cold Spring Harb. Perspect. Med.* **2**, 1–23 (2012).
  40. Takeda, A. *et al.* C-terminal alpha-synuclein immunoreactivity in structures other than Lewy bodies in neurodegenerative disorders. *Acta Neuropathol.* **99**, 296–304 (2000).
  41. Champion, D., Pottier, C., Nicolas, G., Le Guennec, K. & Rovelet-Lecrux, A. Alzheimer disease: modeling an A $\beta$ -centered biological network. *Mol. Psychiatry* 1–11 (2016). doi:10.1038/mp.2016.38
  42. Gandy, S. & Heppner, F. L. Microglia as dynamic and essential components of the amyloid hypothesis. *Neuron* **78**, 575–577 (2013).
  43. Sims, R., van der Lee, S. J., Naj, A. C., Bellenguez, C. & *et al.* Novel rare coding variants in *PLCG2*, *ABI3* and *TREM2* implicate microglial-mediated innate immunity in Alzheimer's disease. *Nat. Genet* **49**, 1373-1383 (2017).
  44. Haass, C., Kaether, C., Thinakaran, G. & Sisodia, S. Trafficking and proteolytic processing of APP. *Cold Spring Harb Perspect Med* **2**, a006270 (2012).
  45. Kleinberger, G. *et al.* *TREM2* mutations implicated in neurodegeneration impair cell surface transport and phagocytosis. *Sci. Transl. Med.* **6**, (2014).

46. Postina, R. *et al.* A disintegrin-metalloproteinase prevents amyloid plaque formation and hippocampal defects in an Alzheimer disease mouse model. *J. Clin. Invest.* **113**, 1456–1464 (2004).
47. Kurabayashi, N., Nguyen, M. D. & Sanada, K. The G protein-coupled receptor GPRC5B contributes to neurogenesis in the developing mouse neocortex. *Development* **140**, 4335–4346 (2013).
48. Cool, B. H. *et al.* A flanking gene problem leads to the discovery of a Gprc5b splice variant predominantly expressed in C57BL/6J mouse brain and in maturing neurons. *PLoS One* **5**, (2010).
49. Kim, Y.-J., Sano, T., Nabetani, T., Asano, Y. & Hirabayashi, Y. GPRC5B Activates Obesity-Associated Inflammatory Signaling in Adipocytes. *Sci. Signal.* **5**, ra85-ra85 (2012).
50. Bhat, K. *et al.* The 19S proteasome ATPase Sug1 plays a critical role in regulating MHC class II transcription. *Mol. Immunol.* **45**, 2214–24 (2008).
51. Inostroza-Nieves, Y., Venkatraman, P. & Zavala-Ruiz, Z. Role of Sug1, a 19S proteasome ATPase, in the transcription of MHC I and the atypical MHC II molecules, HLA-DM and HLA-DO. *Immunol. Lett.* **147**, 67–74 (2012).
52. Farrer, L. A. *et al.* Association Between Angiotensin-Converting Enzyme and Alzheimer Disease. *New Engl. J. Med.* **57**, 210–14 (2000).
53. Miners, J. S. *et al.* Angiotensin-converting enzyme levels and activity in Alzheimer's disease: Differences in brain and CSF ACE and association with ACE1 genotypes. *Am. J. Transl. Res.* **1**, 163–177 (2009).
54. Jochemsen, H. M. *et al.* The association of angiotensin-converting enzyme with biomarkers for Alzheimer's disease. *Alzheimer's Res. Ther.* **6**, 1–10 (2014).
55. Kauwe, J. S. K. *et al.* Genome-Wide Association Study of CSF Levels of 59 Alzheimer's Disease Candidate Proteins: Significant Associations with Proteins Involved in Amyloid Processing and Inflammation. *PLoS Genet.* **10**, e1004758 (2014).
56. Baranello, R. J. *et al.* Amyloid-beta protein clearance and degradation (ABCD) pathways and their role in Alzheimer's disease. *Curr. Alzheimer Res.* **12**, 32–46 (2015).
57. Kehoe, P. G. The Coming of Age of the Angiotensin Hypothesis in Alzheimer's Disease: Progress Toward Disease Prevention and Treatment? *J. Alzheimer's Dis.* **62**, In Press (2018).
58. Kehoe, P. G. *et al.* The Rationale and Design of the Reducing Pathology in Alzheimer's Disease through Angiotensin Targeting (RADAR) Trial. *J. Alzheimer's Dis.* **61**, 803–814

- (2017).
59. Miguel, R. F., Pollak, A. & Lubec, G. Metalloproteinase ADAMTS-1 but not ADAMTS-5 is manifold overexpressed in neurodegenerative disorders as Down syndrome, Alzheimer's and Pick's disease. *Brain Res. Mol. Brain Res.* **133**, 1–5 (2005).
  60. Suttkus, A. *et al.* Aggrecan, link protein and tenascin-R are essential components of the perineuronal net to protect neurons against iron-induced oxidative stress. *Cell Death Dis.* **5**, e11119 (2014).
  61. Végh, M. J. *et al.* Reducing hippocampal extracellular matrix reverses early memory deficits in a mouse model of Alzheimer's disease. *Acta Neuropathol. Commun.* **2**, 76 (2014).
  62. Morawski, M., Filippov, M., Tzinia, A., Tsilibary, E. & Vargova, L. ECM in brain aging and dementia. *Prog. Brain Res.* **214**, 207–27 (2014).
  63. Wilcock, D. M. Neuroinflammation in the aging down syndrome brain; lessons from Alzheimer's disease. *Curr Gerontol Geriatr Res* **2012**, 170276 (2012).
  64. Dourlen, P. *et al.* Functional screening of Alzheimer risk loci identifies PTK2B as an in vivo modulator and early marker of Tau pathology. *Mol. Psychiatry* **22**, 874–883 (2017).
  65. Chapuis, J. *et al.* Genome-wide, high-content siRNA screening identifies the Alzheimer's genetic risk factor FERMT2 as a major modulator of APP metabolism. *Acta Neuropathol.* **133**, 955–966 (2017).
  66. Shulman, J. M. *et al.* Functional screening in *Drosophila* identifies Alzheimer's disease susceptibility genes and implicates tau-mediated mechanisms. *Hum. Mol. Genet.* **23**, 870–877 (2014).
  67. Murray, M. E. *et al.* Clinicopathologic and 11C-Pittsburgh compound B implications of Thal amyloid phase across the Alzheimer's disease spectrum. *Brain* 1–12 (2015). doi:10.1093/brain/awv050
  68. Shi, Y. *et al.* ApoE4 markedly exacerbates tau-mediated neurodegeneration in a mouse model of tauopathy. *Nature* **549**, 523–527 (2017).
  69. Brier, M. R. *et al.* Tau and A $\beta$  imaging, CSF measures, and cognition in Alzheimer's disease. *Sci. Transl. Med.* **8**, 338ra66 (2016).



## Meta-analysis of genetic association with diagnosed Alzheimer's disease identifies novel risk loci and implicates Abeta, Tau, immunity and lipid processing - Methods

**Samples.** All stage I meta-analysis samples are from four Consortia: the Alzheimer's Disease Genetics Consortium (ADGC), the Cohorts for Heart and Aging Research in Genomic Epidemiology (CHARGE) Consortium, the European Alzheimer's Disease Initiative (EADI), and the Genetic and Environmental Risk in Alzheimer's Disease (GERAD) Consortium. Summary demographics of all 37 case-control studies from the four consortia are described in **Table 1** and **Supplementary Tables 1 and 2**. Written informed consent was obtained from study participants or, for those with substantial cognitive impairment, from a caregiver, legal guardian or other proxy. Study protocols for all cohorts were reviewed and approved by the appropriate institutional review boards. Further details of all cohorts can be found in the **Supplementary Note**.

**Pre-imputation genotype chip quality control.** Standard quality control (QC) was performed on all datasets individually, including exclusion of individuals with low call rate (<90%), individuals with a high degree of relatedness ( $\pi_{\text{hat}} > 0.98$ ) and variants with low call rate (<95%). Individuals with non-European ancestry according to principal components (PCs) analysis of ancestry informative markers were excluded from the further analysis.

**Imputation and pre-analysis quality control.** Following genotype chip QC, each dataset was phased and imputed with data to the 1000 Genomes Project (phase 1 integrated release 3, March 2012)<sup>1</sup> using SHAPEIT/IMPUTE2<sup>2,3</sup> or MaCH/Minimac<sup>4,5</sup> software (**Supplementary Table 3**). All reference population haplotypes were used for the imputation as this method improves accuracy of imputation for low-frequency variants<sup>6</sup>. Common variants (MAF  $\geq 0.01\%$ ) with an  $r^2 < 0.30$  from MaCH or an information measure  $< 0.40$  from IMPUTE2 were excluded from further analyses. Rare variants (MAF  $< 0.01\%$ ) with a 'global' weighted imputation quality score of  $< 0.70$  were also excluded from analyses. This score was calculated by weighting each variants MACH/IMPUTE2 imputation quality score by study sample size and combining these weighted scores for use as a post-analysis filter. We also required the presence of each variant in 30% of AD cases and 30% of controls across all datasets.

**Association Analysis.** The Stage 1 discovery meta-analysis was followed by Stage 2, and Stage 3 (A and B) replication analyses. Stage 2 was data from a custom array with 11,632 assays selected as variants with  $P < 10^{-3}$  from our 2013 work<sup>7</sup>. Genotypes were determined for 8,362 cases and 10,484 controls (**Supplementary Table 20**). Stage 3A was conducted for variants

selected as novel loci from meta-analyses of Stages 1 and 2 with  $P < 5 \times 10^{-7}$  (6 variants) and variants that were previously significant ( $P < 5 \times 10^{-8}$ ) that were not genome-wide significant after Stages 1 and 2 (2 variants) (3,348 cases and 3,650 controls) (**Supplementary Table 21**). Stage 3B, which combined samples from Stage 2 and 3A, was conducted for variants with  $MAF < 0.05$  and  $P < 1 \times 10^{-5}$  or variants with  $MAF \geq 0.05$  and  $P < 5 \times 10^{-6}$  from genome regions not covered on the Stage 2 custom array (11,710 cases and 14,133 controls) (**Supplementary Table 6**). For Stages 1, 2, and 3, samples did not overlap.

Stage 1 single variant-based association analysis was conducted on genotype dosages modeling for an additive genotype model and adjusting for age (defined as age-at-onset for cases and age-at-last exam for controls), sex and population substructure using PCs<sup>8</sup>. The score test was implemented on all case-control datasets. This test was shown to be optimal for meta-analysis of rare variants due to its balance between power and control of type 1 error<sup>9</sup>. Family datasets were tested using the R package GWAF<sup>10</sup>, with generalized estimating equations (GEE) implemented for common variants ( $MAF \geq 0.01$ ), and a general linear mixed effects model (GLMM) implemented for rare variants ( $MAF < 0.01$ ), per internal data showing behavior of test statistics for GEE was fine for common variants but inflated for rare variants, while GLMM controlled this rare variant inflation. Variants with regression coefficient  $|\beta| > 5$  or P value equal to 0 or 1 were excluded from further analysis.

Within-study results for Stage 1 were meta-analyzed in METAL<sup>11</sup> using an inverse-variance based model with genomic control. The meta-analysis was split into two separate analyses based on the study sample size, with all studies being included in the analysis of common variants ( $MAF \geq 0.01$ ), and only studies with a total sample size of 400 or greater being included in the rare variant ( $MAF < 0.01$ ) analysis. We also conducted a second meta-analysis in METAL using a sample-size weighted meta-analysis model. Results of this model were compared to the inverse-variance weighted meta-analysis, and results that differed by more than 3 logs on both  $P$ -values were removed from further analysis. Regression coefficients for rare variants can at times be unstable<sup>12</sup>, and this step attempted to control for these problematic variants by using a second method of meta-analysis that may be less sensitive to certain properties of rare variant analysis. In total, 11 variants were removed through this comparison, and most results showed very little difference in  $P$ -values between the two methods. An additional 106 variants with high heterogeneity between studies (defined as  $I^2 > 75$ ) were removed. Figures for association signals were generated with LocusZoom software<sup>13</sup>. Genome-wide summary statistics are available from The National Institute on Aging Genetics of Alzheimer's Disease (NIAGADS) website (<https://www.niagads.org/>). These analyses were conducted by two independent consortia

(ADGC and EADI) and then cross-validated. Analyses for Stage 2 and Stage 3 followed these same analysis procedures, except covariate adjustments per cohort, where all analyses were adjusted on sex and age apart from Italian and Swedish cohorts, which were also adjusted for PCs.

GCTA<sup>14</sup> was used to conduct conditional analysis using 37,635 individuals from the ADGC as a reference panel for calculation of linkage disequilibrium (LD). LDLink<sup>15</sup> was used to conduct LD, using all 5 CEU populations as the reference for calculations.

**Stage 2 and 3 Genotyping and Quality Control.** Datasets for Stage 2 analysis were obtained from previous genotyping from Lambert et al. 2013<sup>7</sup> of 11,632 single nucleotide variants genotyped using Illumina iSelect technology. Eight variants from Stage 3A were genotyped using Taqman technology. Stage 3B included 23 variants included as part of Sequenom MassArray iPLEX panels and 10 additional variants genotyped using Taqman technology.

Per sample quality checks for genetic sex and relatedness were performed in PLINK. Individuals not matching their reported sex or showing a high degree of relatedness (IBD value of 0.98 or greater) were removed from the analysis. A panel of ancestry-informative markers (AIMs), was used to perform PCA analysis with SMARTPCA from EIGENSOFT 4.2 software<sup>16</sup>, and individuals with non-European ancestry were excluded. Variant quality control was also performed separately in each country including removal of variants missing in more than 10% of individuals, having a Hardy-Weinberg P value in controls lower than  $1 \times 10^{-6}$ , or a P value for missingness between cases and controls lower than  $1 \times 10^{-6}$ . Please see Lambert et al. for a more detailed description of the QC procedures followed in Stage 2 analysis. After quality control, 18,845 individuals (8,362 cases and 10,483 controls) were available for the stage 2 analysis. The same quality control measures were applied to data for the Stage 3 variants attained from follow-up genotyping.

**Selection of variants for 3B follow-up genotyping.** In order to prioritize variants for genotyping in Stage 3B, we first selected all MAF < 0.05 variants with  $P < 1 \times 10^{-5}$  or MAF  $\geq 0.05$  variants with  $P < 5 \times 10^{-6}$  in novel loci not covered in the iSelect genotyping from Stage 2 of Lambert et al.<sup>7</sup> A total of 180 variants were considered for follow up due to meeting the P-value criteria and not being in an IGAP 2013 locus. 88 of these variants were in a region covered in the replication genotyping chip from 2013 and thus were removed from further consideration. 33 loci remained after their removal, with 19 loci having only one prioritized variant, which we selected for genotyping. Remaining variants in 14 regions with multiple prioritized variants were then

annotated with GWAVA<sup>17</sup> and CADD<sup>18</sup> scores (using ANNOVAR<sup>19</sup>), Ensembl Variant Effect Predictor (VEP) Consequences (using Ensembl VEP<sup>20</sup>), GWAS3D<sup>21</sup>, RegulomeDB<sup>22</sup>, and FANTOM5<sup>23</sup> (using NIAGADS GenomicsDB) in order to rank their functional potential. A CADD score > 10, GWAVA score > 0.5, FATHMM > 0.5, RegulomeDB score < 5 and GWAS3D top p-value score were considered 'functional' in the ranking. The top ranked variant for functional potential for each locus with multiple variants was selected for further genotyping and analysis. Removal of 59 variants in regions with multiple variants left 33 total variants for follow-up genotyping.

**Characterization of gene(s) and non-coding features in associated loci.** We determined the basepair (bp) boundaries of the search space for potential gene(s) and non-coding features in each of the 24 associated loci (excluding *APOE*) using the 'proxy search' mechanism in LDLink<sup>15</sup>. LDLink uses 1000 genomes genotypes to calculate LD for a selected population; in our case all five European population were selected (CEU, TSI, FIN, GBR, and IBS). The boundaries for all variants in LD ( $r_2 \geq 0.5$ ) with the top associated variant from the stage 2 meta-analysis for each region  $\pm 500\text{kb}$  of the ends of the LD blocks (as expression quantitative trait loci (eQTL) controlled genes are typically less than 500kb from their controlling variant<sup>24</sup>) were input into the UCSC genome browser's 'Table Browser' for RefSeq<sup>25</sup> and GENCODEv24<sup>26</sup> genes at each associated locus.

**Human brain gene expression and eQTL analysis.** To identify potential functional risk gene(s) at each associated locus we first identified variants with suggestive significance ( $P > 10^{-5}$ ) in LD ( $r_2 \geq 0.5$ ) and within 500kb of the sentinel variants for the 23 associated loci (excluding *APOE*) (N=3,576 variants). We then identified functionally interesting variants in this set of variants using RegulomeDB<sup>22</sup>, HaploReg v4.1<sup>27,28</sup>, GWAS3D<sup>21</sup>. Variants with a RegulomeDB score  $\geq 2$  (N=160), in high LD ( $r_2 > 0.8$ ) and with evidence of at least one cis-eQTL in any tissue via HaploReg (N=3,407), or with a  $P \geq 5 \times 10^{-8}$  in GWAS3D (N=1,120) were selected. We then searched for genes functionally linked via eQTLs in blood (including all immune-related cell types) and brain tissue types using this expanded list of variants (N=3,470). eQTL databases searched included BRAINEAC<sup>29</sup>, SCANDb<sup>30</sup>, the NESDA NTR Conditional eQTL Catalog<sup>31</sup>, GTEx<sup>32</sup>, exSNP<sup>33</sup> and Zou et al.<sup>34</sup>. Additional eQTL analysis was conducted with INFERNO<sup>35</sup>, where 44 GTEx tissues were searched, with prioritization on the INFERNO tissue classes of brain, blood, and connective tissue (including fibroblasts). INFERNO analyses identified 1,338 unique variants in LD ( $r_2 \geq 0.7$ ) with the sentinel variants, 1,087 of which are eQTLs (**Supplementary Table 10**).

We also evaluated gene expression of all candidate genes in the associated loci, defined as all genes within  $\pm 500\text{kb}$  of the sentinel variant linkage disequilibrium (LD) regions ( $r^2 \geq 0.5$ ) (see **Supplementary Table 7** for a complete list of genes searched), using gene expression data from AlzBase<sup>36</sup> and the Barres Human and Mouse Brain RNA-Seq Resource<sup>37,38</sup>. AlzBase includes transcription data from brain and blood from aging, non-dementia, mild cognitive impairment, early stage AD and late stage AD. Please see ALZBase (<http://alz.big.ac.cn/alzBase/Document>) for a complete list of studies included in the search. Genes differentially expressed in the same direction in two or more studies of AD are highlighted in **Supplementary Table 12**.

**Pathway Analysis.** Pathway analyses were performed with MAGMA<sup>39</sup>, which performs SNP-wise gene analysis of summary statistics with correction for LD between variants and genes to test whether sets of genes are jointly associated with a phenotype (i.e. LOAD), compared to other genes across the genome. Adaptive permutation was used to produce an empirical p-value and an FDR-corrected q-value. Gene-sets used in the analyses were from GO<sup>40,41</sup>, KEGG<sup>42,43</sup>, REACTOME<sup>44,45</sup>, BIOCARTA, and MGI<sup>46</sup> pathways. Analyses were restricted to gene sets containing between 10 and 500 genes, a total of 10,861 sets. Variants were restricted to common variants ( $\text{MAF} \geq 0.01$ ) and rare variants ( $\text{MAF} < 0.01$ ) only for each analysis, and separate analyses for each model included and excluded the *APOE* region (Chr19:45,116,911-46,318,605). Analyses were also performed after removal of all genome-wide significant genes. Primary analyses used a 35-kb upstream/10-kb downstream window around each gene in order to identify potential regulatory variants for each gene, while secondary analyses was run using a 0-kb window<sup>47</sup>. To test for significant correlation between common and rare variant gene results we performed a gene property analysis in MAGMA, regressing the gene-wide association statistics from rare variants on the corresponding statistics from common variants, correcting for LD between variants and genes using the ADGC reference panel. The A $\beta$ -centered network pathway analysis used a curated list of A $\beta$  processing related genes from Campion et al.<sup>48</sup> Thirty-two A $\beta$ -related gene sets and all 335 genes combined (see Campion et al.<sup>48</sup> for details) were run in MAGMA pathway analysis on both common ( $\text{MAF} \geq 0.01$ ) and rare ( $\text{MAF} < 0.01$ ) variant summary results. The combined dataset of 37,635 individuals from the ADGC were used as a reference set for LD calculations in these analyses.

**Validation of prioritization method.** Evaluation of the prioritization of the risk genes in genome-wide loci was done using STRINGdb<sup>49</sup>, Jensen Diseases<sup>50</sup>, Jensen Tissues<sup>51</sup>, and the ARCHS4<sup>52</sup> resource via the EnrichR<sup>53</sup> tool. We evaluated both the 469 genes set list and the prioritized 68

genes set list (adding in *APOE* to both lists) using the standard settings for both STRINGdb and EnrichR.

### **Data Availability**

Stage 1 data (individual level) for the GERAD cohort can be accessed by applying directly to Cardiff University. Stage 1 ADGC data are deposited in a NIAGADS- and NIA/NIH-sanctioned qualified-access data repository. Stage 1 CHARGE data are accessible by applying to dbGaP for all US cohorts and to Erasmus University for Rotterdam data. AGES primary data are not available owing to Icelandic laws. Genome-wide summary statistics for the Stage 1 discovery are available from The National Institute on Aging Genetics of Alzheimer's Disease (NIAGADS) website (<https://www.niagads.org/>). Stage 2 and stage 3 primary data are available upon request.



## Methods References

1. Genomes Project, C. *et al.* An integrated map of genetic variation from 1,092 human genomes. *Nature* **491**, 56–65 (2012).
2. Howie, B. N., Donnelly, P. & Marchini, J. A flexible and accurate genotype imputation method for the next generation of genome-wide association studies. *PLoS Genet* **5**, e1000529 (2009).
3. Delaneau, O., Marchini, J. & Zagury, J. F. A linear complexity phasing method for thousands of genomes. *Nat Methods* **9**, 179–181 (2012).
4. Li, Y., Willer, C. J., Ding, J., Scheet, P. & Abecasis, G. R. MaCH: using sequence and genotype data to estimate haplotypes and unobserved genotypes. *Genet Epidemiol* **34**, 816–834 (2010).
5. Howie, B., Fuchsberger, C., Stephens, M., Marchini, J. & Abecasis, G. R. Fast and accurate genotype imputation in genome-wide association studies through pre-phasing. *Nat Genet* **44**, 955–959 (2012).
6. Howie, B., Marchini, J. & Stephens, M. Genotype imputation with thousands of genomes. *G3* **1**, 457–470 (2011).
7. Lambert, J. C. *et al.* Meta-analysis of 74,046 individuals identifies 11 new susceptibility loci for Alzheimer’s disease. *Nat. Genet.* **45**, 1452–8 (2013).
8. Price, A. L. *et al.* Principal components analysis corrects for stratification in genome-wide association studies. *Nat Genet* **38**, 904–909 (2006).
9. Ma, C. *et al.* Recommended Joint and Meta-Analysis Strategies for Case-Control Association Testing of Single Low-Count Variants. *Genet Epidemiol* **37**, 539–550 (2013).
10. Chen, M.-H. H. & Yang, Q. GWAf: an R package for genome-wide association analyses with family data. *Bioinformatics* **26**, 580–581 (2010).
11. Willer, C. J., Li, Y. & Abecasis, G. R. METAL: fast and efficient meta-analysis of genomewide association scans. *Bioinformatics* **26**, 2190–2191 (2010).
12. Lee, S., Abecasis, G. R., Boehnke, M. & Lin, X. Rare-Variant Association Analysis: Study Designs and Statistical Tests. *Am. J. Hum. Genet.* **95**, 5–23 (2014).
13. Pruim, R. J. *et al.* LocusZoom: regional visualization of genome-wide association scan

- results. *Bioinformatics* **26**, 2336–2337 (2010).
14. Yang, J. *et al.* Conditional and joint multiple-SNP analysis of GWAS summary statistics identifies additional variants influencing complex traits. *Nat Genet* **44**, 369–75, S1-3 (2012).
  15. Machiela, M. J. & Chanock, S. J. LDlink : A web-based application for exploring population-specific haplotype structure and linking correlated alleles of possible functional variants. 1–3 (2015).
  16. Patterson, N., Price, A. L. & Reich, D. Population structure and eigenanalysis. *PLoS Genet* **2**, e190 (2006).
  17. Ritchie, G. R., Dunham, I., Zeggini, E. & Flicek, P. Functional annotation of noncoding sequence variants. *Nat Methods* **11**, 294–296 (2014).
  18. Kircher, M. *et al.* A general framework for estimating the relative pathogenicity of human genetic variants. *Nat Genet* **46**, 310–315 (2014).
  19. Wang, K., Li, M. & Hakonarson, H. ANNOVAR: functional annotation of genetic variants from high-throughput sequencing data. *Nucleic Acids Res* **38**, e164 (2010).
  20. McLaren, W. *et al.* Deriving the consequences of genomic variants with the Ensembl API and SNP Effect Predictor. *Bioinformatics* **26**, 2069–2070 (2010).
  21. Li, M. J., Wang, L. Y., Xia, Z., Sham, P. C. & Wang, J. GWAS3D: detecting human regulatory variants by integrative analysis of genome-wide associations, chromosome interactions and histone modifications. *Nucleic Acids Res* **41**, W150–W158 (2013).
  22. Boyle, A. P. *et al.* Annotation of functional variation in personal genomes using RegulomeDB. *Genome Res* **22**, 1790–1797 (2012).
  23. Andersson, R. *et al.* An atlas of active enhancers across human cell types and tissues. *Nature* **507**, 455–461 (2014).
  24. Zhang, X. *et al.* Synthesis of 53 tissue and cell line expression QTL datasets reveals master eQTLs. *BMC Genomics* **15**, 532 (2014).
  25. Pruitt, K. D., Tatusova, T., Brown, G. R. & Maglott, D. R. NCBI Reference Sequences (RefSeq): current status, new features and genome annotation policy. *Nucleic Acids Res* **40**, D130-5 (2012).

26. Harrow, J. *et al.* GENCODE: the reference human genome annotation for The ENCODE Project. *Genome Res* **22**, 1760–1774 (2012).
27. Ward, L. D. & Kellis, M. HaploReg: a resource for exploring chromatin states, conservation, and regulatory motif alterations within sets of genetically linked variants. *Nucleic Acids Res* **40**, D930-4 (2012).
28. Ward, L. D. & Kellis, M. HaploReg v4: systematic mining of putative causal variants, cell types, regulators and target genes for human complex traits and disease. *Nucleic Acids Res.* **44**, gkv1340 (2015).
29. Ramasamy, A. *et al.* Genetic variability in the regulation of gene expression in ten regions of the human brain. *Nat. Neurosci.* **17**, 1418–1428 (2014).
30. Gamazon, E. R. *et al.* SCAN: SNP and copy number annotation. *Bioinformatics* **26**, 259–262 (2010).
31. Jansen, R. *et al.* Conditional eQTL Analysis Reveals Allelic Heterogeneity of Gene Expression. *Hum. Mol. Genet.* **26**, 1444–1451 (2017).
32. Consortium, G. Te. The Genotype-Tissue Expression (GTEx) project. *Nat Genet* **45**, 580–585 (2013).
33. Yu, C.-H., Pal, L. R. & Moulton, J. Consensus Genome-Wide Expression Quantitative Trait Loci and Their Relationship with Human Complex Trait Disease. *Omi. A J. Integr. Biol.* **20**, 400–414 (2016).
34. Zou, F. *et al.* Brain expression genome-wide association study (eGWAS) identifies human disease-associated variants. *PLoS Genet* **8**, e1002707 (2012).
35. Amlie-Wolf, A. *et al.* INFERNO – INFERring the molecular mechanisms of NOncoding genetic variants. *bioRxiv* **Oct 30**, (2017).
36. Bai, Z. *et al.* AlzBase: an Integrative Database for Gene Dysregulation in Alzheimer's Disease. *Mol. Neurobiol.* **53**, 310–319 (2016).
37. Zhang, Y. *et al.* An RNA-sequencing transcriptome and splicing database of glia, neurons, and vascular cells of the cerebral cortex. *J. Neurosci.* **34**, 11929–11947 (2014).
38. Zhang, Y. *et al.* Purification and Characterization of Progenitor and Mature Human Astrocytes Reveals Transcriptional and Functional Differences with Mouse. *Neuron* **89**,

- 37–53 (2016).
39. de Leeuw, C. A., Mooij, J. M., Heskes, T. & Posthuma, D. MAGMA: Generalized Gene-Set Analysis of GWAS Data. *PLoS Comput. Biol.* **11**, 1–19 (2015).
  40. Ashburner, M. *et al.* Gene ontology: tool for the unification of biology. The Gene Ontology Consortium. *Nat Genet* **25**, 25–29 (2000).
  41. Blake, J. A. *et al.* Gene ontology consortium: Going forward. *Nucleic Acids Res.* **43**, D1049–D1056 (2015).
  42. Kanehisa, M., Sato, Y., Kawashima, M., Furumichi, M. & Tanabe, M. KEGG as a reference resource for gene and protein annotation. *Nucleic Acids Res.* **44**, D457–D462 (2016).
  43. Ogata, H. *et al.* KEGG: Kyoto encyclopedia of genes and genomes. *Nucleic Acids Res.* **27**, 29–34 (1999).
  44. Fabregat, A. *et al.* The reactome pathway knowledgebase. *Nucleic Acids Res.* **44**, D481–D487 (2016).
  45. Croft, D. *et al.* Reactome: a database of reactions, pathways and biological processes. *Nucleic Acids Res* **39**, D691-7 (2011).
  46. Eppig, J. T., Blake, J. a, Bult, C. J., Kadin, J. a & Richardson, J. E. The Mouse Genome Database (MGD): facilitating mouse as a model for human biology and disease. *Nucleic Acids Res.* 1–11 (2014). doi:10.1093/nar/gku967
  47. Network, P. Psychiatric genome-wide association study analyses implicate neuronal, immune and histone pathways. *Nat. Neurosci.* (2015). doi:10.1038/nn.3922
  48. Champion, D., Pottier, C., Nicolas, G., Le Guennec, K. & Rovelet-Lecrux, A. Alzheimer disease: modeling an A $\beta$ -centered biological network. *Mol. Psychiatry* 1–11 (2016). doi:10.1038/mp.2016.38
  49. Szklarczyk, D. *et al.* STRING v10: Protein-protein interaction networks, integrated over the tree of life. *Nucleic Acids Res.* **43**, D447–D452 (2015).
  50. Pletscher-Frankild, S., Pallejà, A., Tsafou, K., Binder, J. X. & Jensen, L. J. DISEASES: Text mining and data integration of disease-gene associations. *Methods* **74**, 83–89 (2015).

51. Santos, A. *et al.* Comprehensive comparison of large-scale tissue expression datasets. *PeerJ* **3**, e1054 (2015).
52. Lachmann, A. *et al.* Massive Mining of Publicly Available RNA-seq Data from Human and Mouse. *Bioarxiv* 1–9 (2017). doi:10.1101/189092
53. Kuleshov, M. V. *et al.* Enrichr: a comprehensive gene set enrichment analysis web server 2016 update. *Nucleic Acids Res.* **44**, W90–W97 (2016).

## Meta-analysis of genetic association with diagnosed Alzheimer's disease identifies novel risk loci and implicates Abeta, Tau, immunity and lipid processing - Figures

**Figure 1.** Manhattan plot of meta-analysis of Stage 1, 2 and 3 results for genome-wide association with Alzheimer's disease. The threshold for genome-wide significance ( $P < 5 \times 10^{-8}$ ) is indicated by the red line, while the blue line represents the suggestive threshold ( $P < 1 \times 10^{-5}$ ). Loci previously identified by the Lambert et al. 2013 IGAP GWAS are shown in green, and newly associated loci are shown in red. Diamonds represent variants with the smallest  $P$  values for each genome-wide locus.

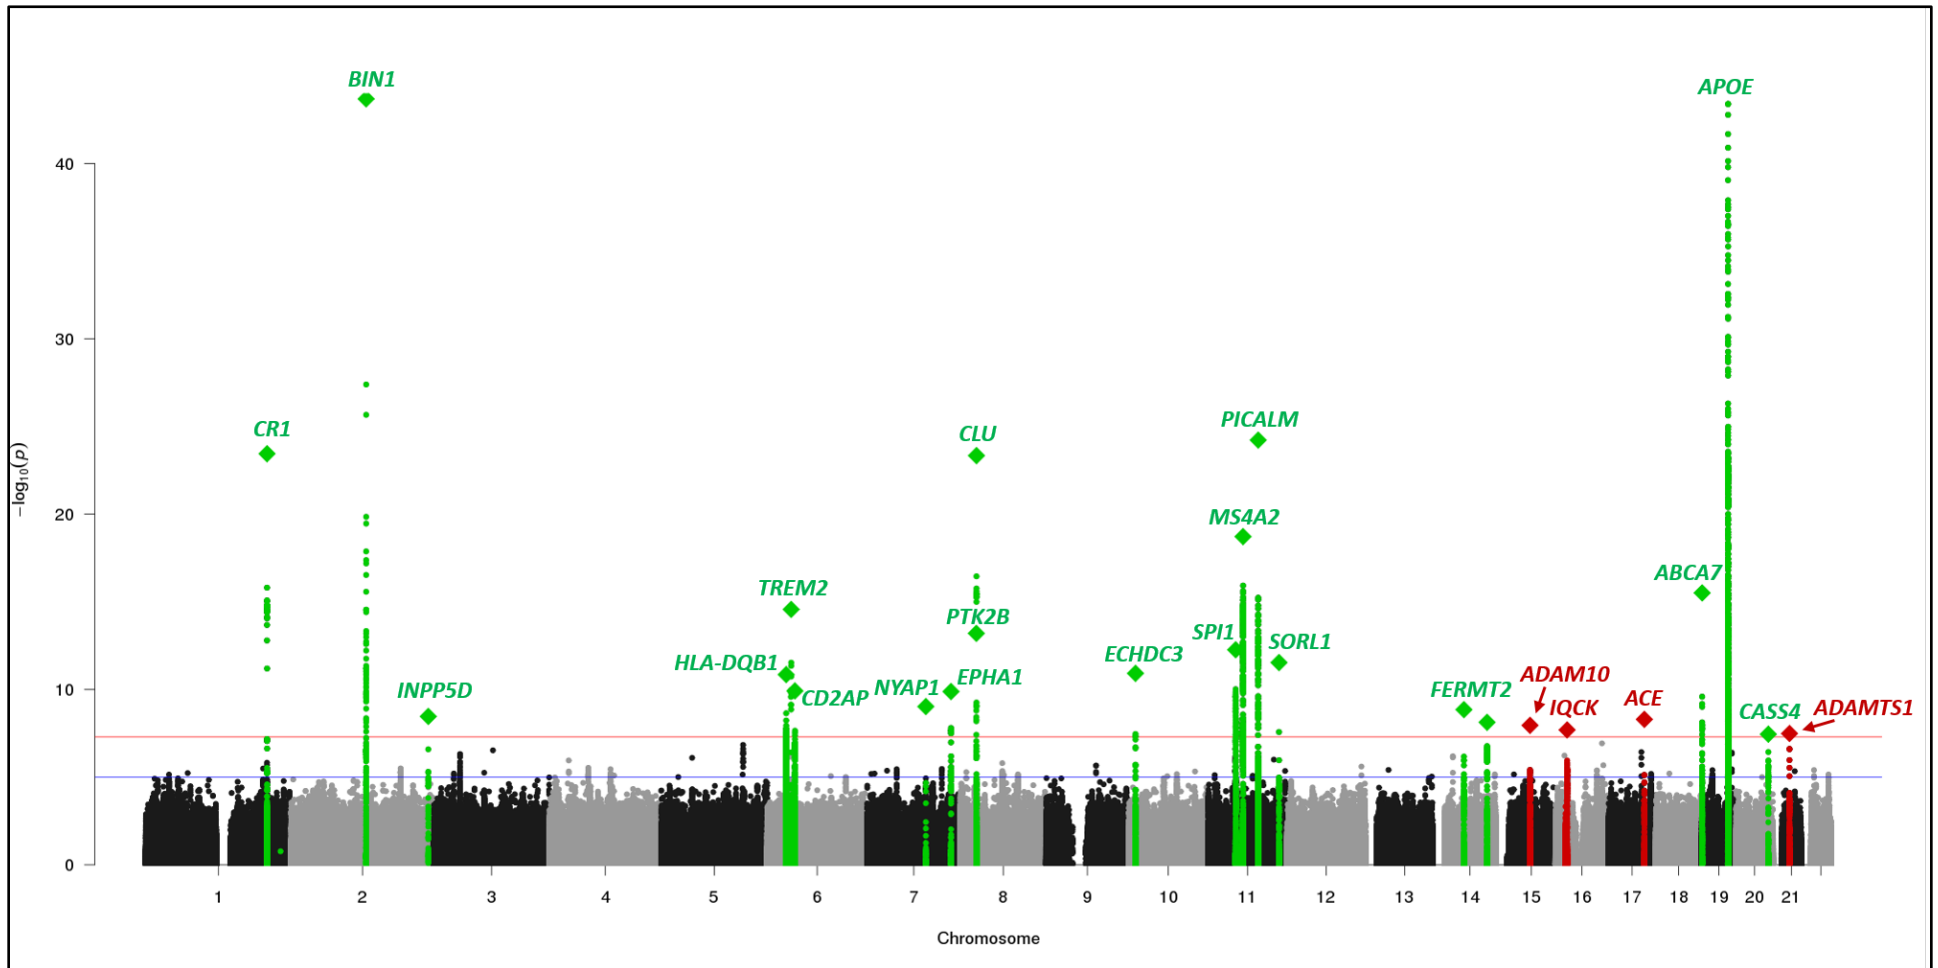



**Meta-analysis of genetic association with diagnosed Alzheimer's disease identifies novel risk loci and implicates Abeta, Tau, immunity and lipid processing - Tables**

**Table 1. Summary of discovery stage 1, stage 2 and overall meta-analyses results for identified loci reaching genome-wide significance after stages 1 and 2.**

| SNP <sup>a</sup>                                                         | Chr. | Position <sup>b</sup> | Closest gene <sup>c</sup> | Major/minor alleles | MAF <sup>d</sup> | Stage 1 Discovery (n=63,926) |                          | Stage 2 (n=18,845)                                   |                         | Overall Stages 1 + Stage 2 (n=82,771) |                         |                                          |
|--------------------------------------------------------------------------|------|-----------------------|---------------------------|---------------------|------------------|------------------------------|--------------------------|------------------------------------------------------|-------------------------|---------------------------------------|-------------------------|------------------------------------------|
|                                                                          |      |                       |                           |                     |                  | OR (95% CI) <sup>e</sup>     | Meta P value             | OR (95% CI) <sup>e</sup>                             | Meta P value            | OR (95% CI) <sup>e</sup>              | Meta P value            | I <sup>2</sup> (%), P value <sup>f</sup> |
| <b>Previous genome-wide significant loci still reaching significance</b> |      |                       |                           |                     |                  |                              |                          |                                                      |                         |                                       |                         |                                          |
| rs4844610                                                                | 1    | 207802552             | CR1                       | C/A                 | 0.187            | 1.16 (1.12-1.20)             | 8.2 x 10 <sup>-16</sup>  | 1.20 (1.13-1.27)                                     | 3.8 x 10 <sup>-10</sup> | 1.17 (1.13-1.21)                      | 3.6 x 10 <sup>-24</sup> | 0, 8 x 10 <sup>-1</sup>                  |
| rs6733839                                                                | 2    | 127892810             | BIN1                      | C/T                 | 0.407            | 1.18 (1.15-1.22)             | 4.0 x 10 <sup>-28</sup>  | 1.23 (1.18-1.29)                                     | 2.0 x 10 <sup>-18</sup> | 1.20 (1.17-1.23)                      | 2.1 x 10 <sup>-44</sup> | 15, 2 x 10 <sup>-1</sup>                 |
| rs10933431                                                               | 2    | 233981912             | INPP5D                    | C/G                 | 0.223            | 0.90 (0.87-0.94)             | 2.6 x 10 <sup>-7</sup>   | 0.92 (0.87-0.97)                                     | 3.2 x 10 <sup>-3</sup>  | 0.91 (0.88-0.94)                      | 3.4 x 10 <sup>-9</sup>  | 0, 8 x 10 <sup>-1</sup>                  |
| rs78738018                                                               | 6    | 32575406              | HLA-DQB1                  | T/A                 | 0.270            | 1.10 (1.06-1.14)             | 5.1 x 10 <sup>-8</sup>   | 1.11 (1.06-1.17)                                     | 5.7 x 10 <sup>-5</sup>  | 1.10 (1.07-1.13)                      | 1.4 x 10 <sup>-11</sup> | 10, 3 x 10 <sup>-1</sup>                 |
| rs75932628                                                               | 6    | 41129252              | TREM2                     | C/T                 | 0.008            | 2.01 (1.65-2.44)             | 2.9 x 10 <sup>-12</sup>  | 2.50 (1.56-4.00)                                     | 1.5 x 10 <sup>-4</sup>  | 2.08 (1.73-2.49)                      | 2.7 x 10 <sup>-15</sup> | 0, 6 x 10 <sup>-1</sup>                  |
| rs9473117                                                                | 6    | 47431284              | CD2AP                     | A/C                 | 0.280            | 1.09 (1.05-1.12)             | 2.3 x 10 <sup>-7</sup>   | 1.11 (1.05-1.16)                                     | 1.0 x 10 <sup>-4</sup>  | 1.09 (1.06-1.12)                      | 1.2 x 10 <sup>-10</sup> | 0, 6 x 10 <sup>-1</sup>                  |
| rs12539172                                                               | 7    | 100091795             | NYAP1 <sup>g</sup>        | C/T                 | 0.303            | 0.93 (0.91-0.96)             | 2.1 x 10 <sup>-5</sup>   | 0.89 (0.84-0.93)                                     | 2.1 x 10 <sup>-6</sup>  | 0.92 (0.90-0.95)                      | 9.3 x 10 <sup>-10</sup> | 0, 8 x 10 <sup>-1</sup>                  |
| rs11762262                                                               | 7    | 143107876             | EPHA1                     | C/A                 | 0.199            | 0.90 (0.87-0.94)             | 3.1 x 10 <sup>-8</sup>   | 0.91 (0.86-0.96)                                     | 1.1 x 10 <sup>-3</sup>  | 0.90 (0.88-0.93)                      | 1.3 x 10 <sup>-10</sup> | 0, 5 x 10 <sup>-1</sup>                  |
| rs73223431                                                               | 8    | 27219987              | PTK2B                     | C/T                 | 0.367            | 1.10 (1.07-1.13)             | 8.3 x 10 <sup>-10</sup>  | 1.11 (1.06-1.16)                                     | 1.5 x 10 <sup>-5</sup>  | 1.10 (1.07-1.13)                      | 6.3 x 10 <sup>-14</sup> | 0, 6 x 10 <sup>-1</sup>                  |
| rs9331896                                                                | 8    | 27467686              | CLU                       | T/C                 | 0.387            | 0.88 (0.85-0.91)             | 3.6 x 10 <sup>-16</sup>  | 0.87 (0.83-0.91)                                     | 1.7 x 10 <sup>-9</sup>  | 0.88 (0.85-0.90)                      | 4.6 x 10 <sup>-24</sup> | 3, 4 x 10 <sup>-1</sup>                  |
| rs3740688                                                                | 11   | 47380340              | SPI1 <sup>h</sup>         | T/G                 | 0.448            | 0.91 (0.89-0.94)             | 9.7 x 10 <sup>-11</sup>  | 0.93 (0.88-0.97)                                     | 1.2 x 10 <sup>-3</sup>  | 0.92 (0.89-0.94)                      | 5.4 x 10 <sup>-13</sup> | 4, 4 x 10 <sup>-1</sup>                  |
| rs7933202                                                                | 11   | 59936926              | MS4A2                     | A/C                 | 0.391            | 0.89 (0.86-0.92)             | 2.2 x 10 <sup>-15</sup>  | 0.90 (0.86-0.95)                                     | 1.6 x 10 <sup>-5</sup>  | 0.89 (0.87-0.92)                      | 1.9 x 10 <sup>-19</sup> | 27, 5 x 10 <sup>-2</sup>                 |
| rs3851179                                                                | 11   | 85868640              | PICALM                    | C/T                 | 0.356            | 0.89 (0.86-0.91)             | 5.8 x 10 <sup>-16</sup>  | 0.85 (0.81-0.89)                                     | 6.1 x 10 <sup>-11</sup> | 0.88 (0.86-0.90)                      | 6.0 x 10 <sup>-25</sup> | 0, 8 x 10 <sup>-1</sup>                  |
| rs11218343                                                               | 11   | 121435587             | SORL1                     | T/C                 | 0.040            | 0.81 (0.76-0.88)             | 2.7 x 10 <sup>-8</sup>   | 0.77 (0.68-0.87)                                     | 1.8 x 10 <sup>-5</sup>  | 0.80 (0.75-0.85)                      | 2.9 x 10 <sup>-12</sup> | 7, 3 x 10 <sup>-1</sup>                  |
| rs17125924                                                               | 14   | 53391680              | FERMT2                    | A/G                 | 0.093            | 1.13 (1.08-1.19)             | 6.6 x 10 <sup>-7</sup>   | 1.15 (1.06-1.25)                                     | 5.0 x 10 <sup>-4</sup>  | 1.14 (1.09-1.18)                      | 1.4 x 10 <sup>-9</sup>  | 8, 3 x 10 <sup>-1</sup>                  |
| rs12881735                                                               | 14   | 92932828              | SLC24A4                   | T/C                 | 0.221            | 0.92 (0.88-0.95)             | 4.9 x 10 <sup>-7</sup>   | 0.92 (0.87-0.97)                                     | 4.3 x 10 <sup>-3</sup>  | 0.92 (0.89-0.94)                      | 7.4 x 10 <sup>-9</sup>  | 0, 6 x 10 <sup>-1</sup>                  |
| rs3752246                                                                | 19   | 1056492               | ABCA7                     | C/G                 | 0.182            | 1.13 (1.09-1.18)             | 6.6 x 10 <sup>-10</sup>  | 1.18 (1.11-1.25)                                     | 4.7 x 10 <sup>-8</sup>  | 1.15 (1.11-1.18)                      | 3.1 x 10 <sup>-16</sup> | 0, 5 x 10 <sup>-1</sup>                  |
| rs429358                                                                 | 19   | 45411941              | APOE                      | T/C                 | 0.216            | 0.30 (0.28-0.31)             | 1.2 x 10 <sup>-881</sup> | APOE region not carried forward to replication stage |                         |                                       |                         |                                          |
| rs6024870                                                                | 20   | 54997568              | CASS4                     | G/A                 | 0.088            | 0.88 (0.84-0.93)             | 1.1 x 10 <sup>-6</sup>   | 0.90 (0.82-0.97)                                     | 9.0 x 10 <sup>-3</sup>  | 0.88 (0.85-0.92)                      | 3.5 x 10 <sup>-8</sup>  | 0, 9 x 10 <sup>-1</sup>                  |
| <b>New genome-wide significant loci reaching significance</b>            |      |                       |                           |                     |                  |                              |                          |                                                      |                         |                                       |                         |                                          |
| rs138190086                                                              | 7    | 61538148              | ACE                       | G/A                 | 0.02             | 1.29 (1.15-1.44)             | 7.4 x 10 <sup>-6</sup>   | 1.41 (1.18-1.69)                                     | 1.8 x 10 <sup>-4</sup>  | 1.32 (1.20-1.45)                      | 7.5 x 10 <sup>-9</sup>  | 0, 9 x 10 <sup>-1</sup>                  |
| rs7920721                                                                | 10   | 11720308              | ECDH3                     | A/G                 | 0.389            | 1.08 (1.05-1.11)             | 1.9 x 10 <sup>-7</sup>   | 1.07 (1.02-1.12)                                     | 3.2 x 10 <sup>-3</sup>  | 1.08 (1.05-1.11)                      | 2.3 x 10 <sup>-9</sup>  | 0, 8 x 10 <sup>-1</sup>                  |
| <b>Previous genome-wide significant loci not reaching significance</b>   |      |                       |                           |                     |                  |                              |                          |                                                      |                         |                                       |                         |                                          |
| rs190982                                                                 | 5    | 88223420              | MEF2C                     | A/G                 | 0.390            | 0.95 (0.92-0.97)             | 2.8 x 10 <sup>-4</sup>   | 0.93 (0.89-0.98)                                     | 2.7 x 10 <sup>-3</sup>  | 0.94 (0.92-0.97)                      | 2.8 x 10 <sup>-6</sup>  | 0, 6 x 10 <sup>-1</sup>                  |
| rs4723711                                                                | 7    | 37844263              | NME8                      | A/T                 | 0.356            | 0.95 (0.92-0.98)             | 2.7 x 10 <sup>-4</sup>   | 0.91 (0.87-0.95)                                     | 9.5 x 10 <sup>-5</sup>  | 0.94 (0.91-0.96)                      | 2.8 x 10 <sup>-7</sup>  | 0, 5 x 10 <sup>-1</sup>                  |

aVariants showing the best level of association after meta-analysis of stages 1 and 2.

bBuild 37, assembly hg19.

cBased on position of top SNP in reference to the refSeq assembly

dAverage in the discovery sample.

eCalculated with respect to the minor allele.

fCochran's Q test

gPreviously the ZCWPW1 locus.

hPreviously the CELF1 locus.

**Table 2. Summary of discovery Stage 1, Stage 2, Stage 3 (A and B), and overall meta-analyses results for potential novel loci reaching  $P < 5.10^{-7}$ .**

| SNP <sup>a</sup>       | Chr. | Position <sup>b</sup> | Closest gene <sup>c</sup> | Major/Minor allele | MAF <sup>d</sup> | Stage 1 Discovery (n=63,926) |                      | Stage 2 (n=18,845)       |                      | Stage 3A (n=6,998)       |                      | Overall (n=89,769)       |                       |
|------------------------|------|-----------------------|---------------------------|--------------------|------------------|------------------------------|----------------------|--------------------------|----------------------|--------------------------|----------------------|--------------------------|-----------------------|
|                        |      |                       |                           |                    |                  | OR (95% CI) <sup>e</sup>     | Meta P               | OR (95% CI) <sup>e</sup> | Meta P               | OR (95% CI) <sup>e</sup> | Meta P               | OR (95% CI) <sup>e</sup> | Meta P                |
| rs7920721 <sup>f</sup> | 10   | 11720308              | <i>ECHDC3</i>             | A/G                | 0.389            | 1.08 (1.05-1.11)             | $1.9 \times 10^{-7}$ | 1.07 (1.02-1.12)         | $3.2 \times 10^{-3}$ | 1.13 (1.06-1.22)         | $5.9 \times 10^{-4}$ | 1.08 (1.06-1.11)         | $1.2 \times 10^{-11}$ |
| rs593742               | 15   | 59045774              | <i>ADAM10</i>             | A/G                | 0.295            | 0.94 (0.91-0.97)             | $3.0 \times 10^{-5}$ | 0.92 (0.87-0.97)         | $8.8 \times 10^{-4}$ | 0.91 (0.84-0.99)         | $2.5 \times 10^{-2}$ | 0.93 (0.91-0.95)         | $1.1 \times 10^{-8}$  |
| rs7185636              | 16   | 19808163              | <i>IQCK</i>               | T/C                | 0.18             | 0.92 (0.89-0.96)             | $2.5 \times 10^{-5}$ | 0.90 (0.85-0.95)         | $7.6 \times 10^{-4}$ | 0.93 (0.85-1.01)         | $9.6 \times 10^{-2}$ | 0.92 (0.89-0.95)         | $2.0 \times 10^{-8}$  |
| rs138190086            | 17   | 61538148              | <i>ACE</i>                | G/A                | 0.02             | 1.29 (1.15-1.44)             | $7.4 \times 10^{-6}$ | 1.41 (1.18-1.69)         | $1.8 \times 10^{-4}$ | 1.18 (0.90-1.55)         | $2.4 \times 10^{-1}$ | 1.31 (1.19-1.43)         | $5.0 \times 10^{-9}$  |
| rs2830500              | 21   | 28156856              | <i>ADAMTS1</i>            | C/A                | 0.308            | 0.92 (0.89-0.95)             | $2.5 \times 10^{-7}$ | 0.95 (0.91-1.00)         | $5.7 \times 10^{-2}$ | 0.95 (0.88-1.02)         | $1.7 \times 10^{-1}$ | 0.93 (0.91-0.96)         | $3.2 \times 10^{-8}$  |
| <i>rs190982</i>        | 5    | 88223420              | <i>MEF2C</i>              | A/G                | 0.390            | 0.95 (0.92-0.97)             | $2.8 \times 10^{-4}$ | 0.93 (0.89-0.98)         | $2.7 \times 10^{-3}$ | 0.92 (0.86-0.99)         | $2.4 \times 10^{-2}$ | 0.94 (0.92-0.96)         | $2.4 \times 10^{-7}$  |
| <i>rs4723711</i>       | 7    | 37844263              | <i>NME8</i>               | A/T                | 0.356            | 0.95 (0.92-0.98)             | $2.7 \times 10^{-4}$ | 0.91 (0.87-0.95)         | $9.5 \times 10^{-5}$ | 0.96 (0.90-1.03)         | $3.0 \times 10^{-1}$ | 0.94 (0.92-0.96)         | $2.0 \times 10^{-7}$  |
| SNP <sup>a</sup>       | Chr. | Position <sup>b</sup> | Closest gene <sup>c</sup> | Major/Minor allele | MAF <sup>d</sup> | Stage 1 Discovery (n=63,926) |                      | Stage 3B (n=25,843)      |                      | Overall (n=89,769)       |                      |                          |                       |
|                        |      |                       |                           |                    |                  | OR (95% CI) <sup>e</sup>     | Meta P               | OR (95% CI) <sup>e</sup> | Meta P               | OR (95% CI) <sup>e</sup> | Meta P               |                          |                       |
| rs71618613             | 5    | 29005878              | <i>SUCLG2P4</i>           | A/C                | 0.01             | 0.68 (0.57-0.80)             | $9.8 \times 10^{-6}$ | -                        | -                    | 0.76 (0.63-0.93)         | $6.8 \times 10^{-3}$ | 0.71 (0.63-0.81)         | $3.3 \times 10^{-7}$  |

<sup>a</sup>SNPs showing the best level of association after meta-analysis of stages 1, 2 and 3.

<sup>b</sup>Build 37, assembly hg19.

<sup>c</sup>Based on position of top SNP in reference to the refSeq assembly

<sup>d</sup>Average in the discovery sample.

<sup>e</sup>Calculated with respect to the minor allele.

<sup>f</sup>Recently identified as a LOAD locus in two separate 2017 studies

**Table 3. Significant pathways (q-value≤0.05) from MAGMA pathway analysis for common SNV and rare SNV subsets.**

| Pathway    | N genes in pathway in dataset | Common SNVs <i>P</i> * | Common SNVs q-value | Rare SNVs <i>P</i> * | Rare SNVs q-value | Pathway description                                       |
|------------|-------------------------------|------------------------|---------------------|----------------------|-------------------|-----------------------------------------------------------|
| GO:65005   | 20                            | 1.45E-07*              | 9.53E-04            | 6.76E-02             | 8.42E-01          | protein-lipid complex assembly                            |
| GO:1902003 | 10                            | 4.56E-07*              | 1.49E-03            | 4.94E-02             | 8.42E-01          | regulation of beta-amyloid formation                      |
| GO:32994   | 39                            | 1.16E-06*              | 2.54E-03            | 1.78E-02             | 8.17E-01          | protein-lipid complex                                     |
| GO:1902991 | 12                            | 3.54E-06*              | 5.80E-03            | 5.66E-02             | 8.42E-01          | regulation of amyloid precursor protein catabolic process |
| GO:43691   | 17                            | 5.55E-06*              | 6.75E-03            | 3.08E-02             | 8.17E-01          | reverse cholesterol transport                             |
| GO:71825   | 35                            | 6.18E-06*              | 6.75E-03            | 1.27E-01             | 8.42E-01          | protein-lipid complex subunit organization                |
| GO:34377   | 18                            | 1.64E-05*              | 1.53E-02            | 1.82E-01             | 8.42E-01          | plasma lipoprotein particle assembly                      |
| GO:48156   | 10                            | 3.19E-05*              | 2.61E-02            | 7.77E-01             | 8.54E-01          | tau protein binding                                       |
| GO:2253    | 382                           | 6.32E-05*              | 4.60E-02            | 2.09E-01             | 8.42E-01          | activation of immune response                             |

\*Significant after FDR-correction (q-value≤0.05)

**Table 4. Top results of pathway analysis of A $\beta$ -beta centered biological network from Campion et al (see Supplementary Table 12 for full results).**

| Category                                           | Subcategory                             | N Genes | Common SNVs P<br>0kb | Common SNVs P 35kb-<br>10kb | Rare SNVs P<br>0kb | Rare SNVs P<br>35kb-10kb |
|----------------------------------------------------|-----------------------------------------|---------|----------------------|-----------------------------|--------------------|--------------------------|
| A $\beta$ -centered biological network (all genes) | --                                      | 331     | 2.27E-04*            | 1.54E-04*                   | 8.26E-01           | 5.19E-01                 |
| Clearance and degradation of A $\beta$             | --                                      | 74      | 2.18E-04*            | 3.27E-03                    | 3.13E-01           | 5.11E-01                 |
| Clearance and degradation of A $\beta$             | Microglia                               | 47      | 2.24E-04*            | 1.83E-02                    | 2.49E-01           | 6.87E-01                 |
| Aggregation of A $\beta$                           | --                                      | 35      | 7.09E-04*            | 9.93E-03                    | 9.02E-02           | 1.68E-01                 |
| Aggregation of A $\beta$                           | Miscellaneous                           | 21      | 1.08E-03*            | 3.38E-02                    | 9.53E-02           | 1.90E-01                 |
| APP processing and trafficking                     | Clathrin/caveolin-dependent endocytosis | 10      | 1.19E-03             | 1.15E-02                    | 3.64E-01           | 1.84E-01                 |
| Mediator of A $\beta$ toxicity                     | --                                      | 51      | 3.82E-02             | 4.69E-02                    | 5.89E-01           | 5.70E-01                 |
| Mediator of A $\beta$ toxicity                     | Calcium homeostasis                     | 6       | 6.90E-02             | 1.21E-01                    | 3.96E-01           | 2.54E-01                 |
| Mediator of A $\beta$ toxicity                     | Miscellaneous                           | 3       | 7.61E-02             | 2.35E-02                    | 9.79E-01           | 7.61E-01                 |
| Clearance and degradation of A $\beta$             | Enzymatic degradation of A $\beta$      | 15      | 7.77E-02             | 2.63E-02                    | 6.10E-01           | 2.95E-01                 |
| Mediator of A $\beta$ toxicity                     | Tau toxicity                            | 20      | 9.03E-02             | 3.48E-01                    | 7.17E-01           | 6.85E-01                 |
| Aggregation of A $\beta$                           | Chaperone                               | 9       | 1.52E-01             | 3.09E-01                    | 1.98E-01           | 1.13E-02                 |

\*Significant after Bonferroni correction for 33 pathway sets tested

bioRxiv preprint first posted online April 14, 2018. The copyright holder for this preprint (which was not certified by peer review) is the author/funder, who has granted bioRxiv a license to display the preprint in perpetuity. It is made available under aCC-BY 4.0 International license.

**Table 5. Top prioritized genes in significant loci based on biological evidence.** Genes meeting at least 3 of 4 criteria in each locus are listed. The criteria include: 1) differential expression in at least one Alzheimer disease (AD) study, 2) expression in a tissue relevant to AD (astrocytes, neurons, microglia/macrophages, oligodendrocytes), 3) having an eQTL effect on the gene in any tissue, or having an eQTL on the gene in AD relevant tissue, and 4) being involved in a biological pathway enriched in AD (from the current study). Novel genome-wide loci from the current study are listed first, followed by known genome-wide loci.

| Novel genome-wide loci |                          |                                                                     |                               |                                  |                    |                            |                     |  |
|------------------------|--------------------------|---------------------------------------------------------------------|-------------------------------|----------------------------------|--------------------|----------------------------|---------------------|--|
| Locus                  | Number of genes in locus | Gene                                                                | Differential expression in AD | Expression in AD relevant tissue | eQTL in any tissue | eQTL in AD relevant tissue | In enriched pathway |  |
| ADAM10                 | 17                       | ADAM10                                                              |                               |                                  |                    |                            |                     |  |
| IQCK                   | 12                       | GPRC5B                                                              |                               |                                  |                    |                            |                     |  |
|                        |                          | IQCK                                                                |                               |                                  |                    |                            |                     |  |
|                        |                          | DEF8                                                                |                               |                                  |                    |                            |                     |  |
| ACE                    | 23                       | PSMC5                                                               |                               |                                  |                    |                            |                     |  |
|                        |                          | CD79B                                                               |                               |                                  |                    |                            |                     |  |
| ADAMTS1                | 4                        | ADAMTS1                                                             |                               |                                  |                    |                            |                     |  |
| Known genome-wide loci |                          |                                                                     |                               |                                  |                    |                            |                     |  |
| Locus                  | Number of genes in locus | Gene                                                                | Differential expression in AD | Expression in AD relevant tissue | eQTL in any tissue | eQTL in AD relevant tissue | In enriched pathway |  |
| CR1                    | 13                       | CD55                                                                |                               |                                  |                    |                            |                     |  |
|                        |                          | CR1                                                                 |                               |                                  |                    |                            |                     |  |
| BIN1                   | 10                       | BIN1                                                                |                               |                                  |                    |                            |                     |  |
| INPP5D                 | 14                       | INPP5D                                                              |                               |                                  |                    |                            |                     |  |
| HLA-DQB1               | 59                       | HLA-DPA1                                                            |                               |                                  |                    |                            |                     |  |
|                        |                          | HLA-DRA                                                             |                               |                                  |                    |                            |                     |  |
|                        |                          | C4A                                                                 |                               |                                  |                    |                            |                     |  |
|                        |                          | TNXB                                                                |                               |                                  |                    |                            |                     |  |
|                        |                          | PSMB9                                                               |                               |                                  |                    |                            |                     |  |
|                        |                          | HLA-DRB6                                                            |                               |                                  |                    |                            |                     |  |
|                        |                          | HLA-DRB1                                                            |                               |                                  |                    |                            |                     |  |
|                        |                          | HLA-DRB5                                                            |                               |                                  |                    |                            |                     |  |
|                        |                          | HLA-DQB1                                                            |                               |                                  |                    |                            |                     |  |
|                        |                          | AGPAT1                                                              |                               |                                  |                    |                            |                     |  |
|                        |                          | AGER                                                                |                               |                                  |                    |                            |                     |  |
|                        |                          | HLA-DQA1                                                            |                               |                                  |                    |                            |                     |  |
|                        |                          | C2                                                                  |                               |                                  |                    |                            |                     |  |
| BRD2                   |                          |                                                                     |                               |                                  |                    |                            |                     |  |
| HLA-DQB2               |                          |                                                                     |                               |                                  |                    |                            |                     |  |
| MICB                   |                          |                                                                     |                               |                                  |                    |                            |                     |  |
| TREM2                  | 26                       | TREM2                                                               |                               |                                  |                    |                            |                     |  |
| CD2AP                  | 8                        | CD2AP                                                               |                               |                                  |                    |                            |                     |  |
| NYAP1                  | 60                       | GAL3ST4                                                             |                               |                                  |                    |                            |                     |  |
|                        |                          | EPHB4                                                               |                               |                                  |                    |                            |                     |  |
|                        |                          | PILRB                                                               |                               |                                  |                    |                            |                     |  |
|                        |                          | NYAP1                                                               |                               |                                  |                    |                            |                     |  |
|                        |                          | AGFG2                                                               |                               |                                  |                    |                            |                     |  |
|                        |                          | PILRA                                                               |                               |                                  |                    |                            |                     |  |
| GATS                   |                          |                                                                     |                               |                                  |                    |                            |                     |  |
| EPHA1                  | 27                       | No gene meets 3 of the 4 criteria; 4 genes meet 2 of the 4 criteria |                               |                                  |                    |                            |                     |  |
| PTK2B                  | 12                       | PTK2B                                                               |                               |                                  |                    |                            |                     |  |
|                        |                          | CLU                                                                 |                               |                                  |                    |                            |                     |  |
| CLU                    | 16                       | SCARA3                                                              |                               |                                  |                    |                            |                     |  |
|                        |                          | CLU                                                                 |                               |                                  |                    |                            |                     |  |
| ECHDC3                 | 10                       | No gene meets 3 of the 4 criteria; 6 genes meet 2 of the 4 criteria |                               |                                  |                    |                            |                     |  |
| SPI1                   | 25                       | PSMC3                                                               |                               |                                  |                    |                            |                     |  |
|                        |                          | MTCH2                                                               |                               |                                  |                    |                            |                     |  |
|                        |                          | MADD                                                                |                               |                                  |                    |                            |                     |  |
|                        |                          | NUP160                                                              |                               |                                  |                    |                            |                     |  |
|                        |                          | PTPMT1                                                              |                               |                                  |                    |                            |                     |  |
|                        |                          | CELF1                                                               |                               |                                  |                    |                            |                     |  |
| MS4A6A                 | 24                       | RAPSN                                                               |                               |                                  |                    |                            |                     |  |
|                        |                          | NR1H3                                                               |                               |                                  |                    |                            |                     |  |
|                        |                          | MS4A6A                                                              |                               |                                  |                    |                            |                     |  |
|                        |                          | MS4A4A                                                              |                               |                                  |                    |                            |                     |  |
| PICALM                 | 12                       | OSBP                                                                |                               |                                  |                    |                            |                     |  |
|                        |                          | SYTL2                                                               |                               |                                  |                    |                            |                     |  |
| SORL1                  | 4                        | PICALM                                                              |                               |                                  |                    |                            |                     |  |
|                        |                          | SORL1                                                               |                               |                                  |                    |                            |                     |  |
| FERMT2                 | 10                       | FERMT2                                                              |                               |                                  |                    |                            |                     |  |
|                        |                          | PSMC6                                                               |                               |                                  |                    |                            |                     |  |
|                        |                          | STYX                                                                |                               |                                  |                    |                            |                     |  |
| SLC24A4                | 11                       | LGMN                                                                |                               |                                  |                    |                            |                     |  |
|                        |                          | RIN3                                                                |                               |                                  |                    |                            |                     |  |
|                        |                          | SLC24A4                                                             |                               |                                  |                    |                            |                     |  |
| ABCA7                  | 49                       | POLR2E                                                              |                               |                                  |                    |                            |                     |  |
|                        |                          | STK11                                                               |                               |                                  |                    |                            |                     |  |
|                        |                          | CNN2                                                                |                               |                                  |                    |                            |                     |  |
|                        |                          | HMHA1                                                               |                               |                                  |                    |                            |                     |  |
|                        |                          | CFD                                                                 |                               |                                  |                    |                            |                     |  |
|                        |                          | ABCA7                                                               |                               |                                  |                    |                            |                     |  |
| BSG                    |                          |                                                                     |                               |                                  |                    |                            |                     |  |
| CASS4                  | 12                       | CSTF1                                                               |                               |                                  |                    |                            |                     |  |
